# Supplementary material for: Lkb1 inactivation drives lung cancer lineage switching governed by Polycomb Repressive Complex 2
Source: PubMed Central journal article supplement (PMC5385585; doi:10.1038/ncomms14922), 2017-04-07
Supplement: ncomms14922-s1.pdf [file ncomms14922-s1.pdf]

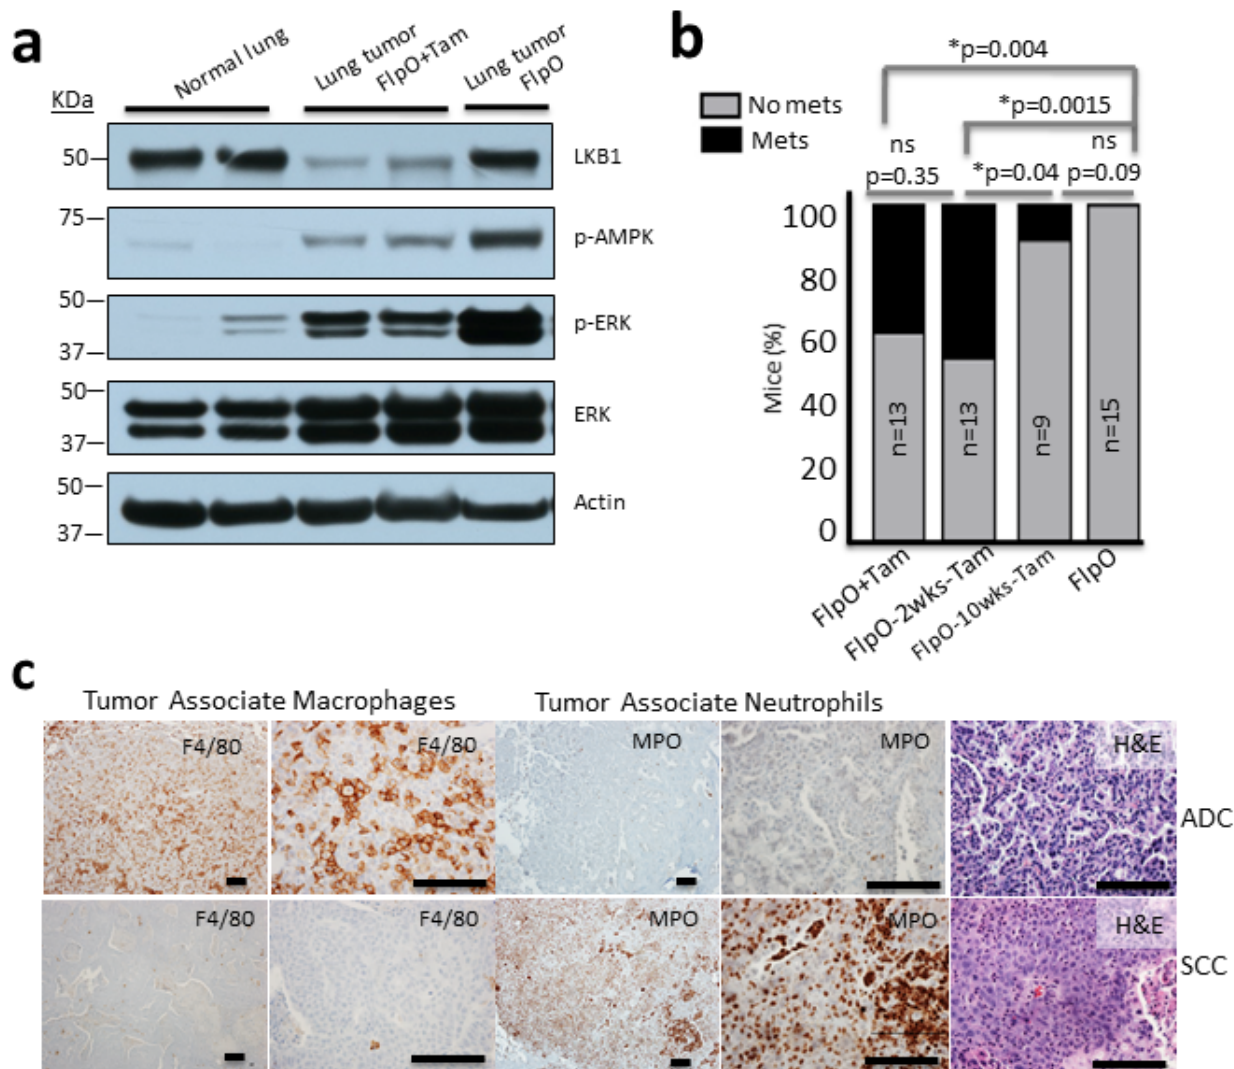

**Supplementary Figure 1: *Lkb1* deletion drives SCC transition and tumor progression in established *KRAS* tumors**

**a)** Western Blotting for LKB1, p-AMPK, p-ERK and total ERK in the indicated whole cell extracts. *Lkb1* deletion markedly decreases p-AMPK as expected.  $\beta$ -actin is the loading control. **b)** Incidence of metastasis within the cohorts as assessed by histologic examination of lymph nodes at endpoint, n and p values indicated on figure, p values represent Chi-squared test. **c)**

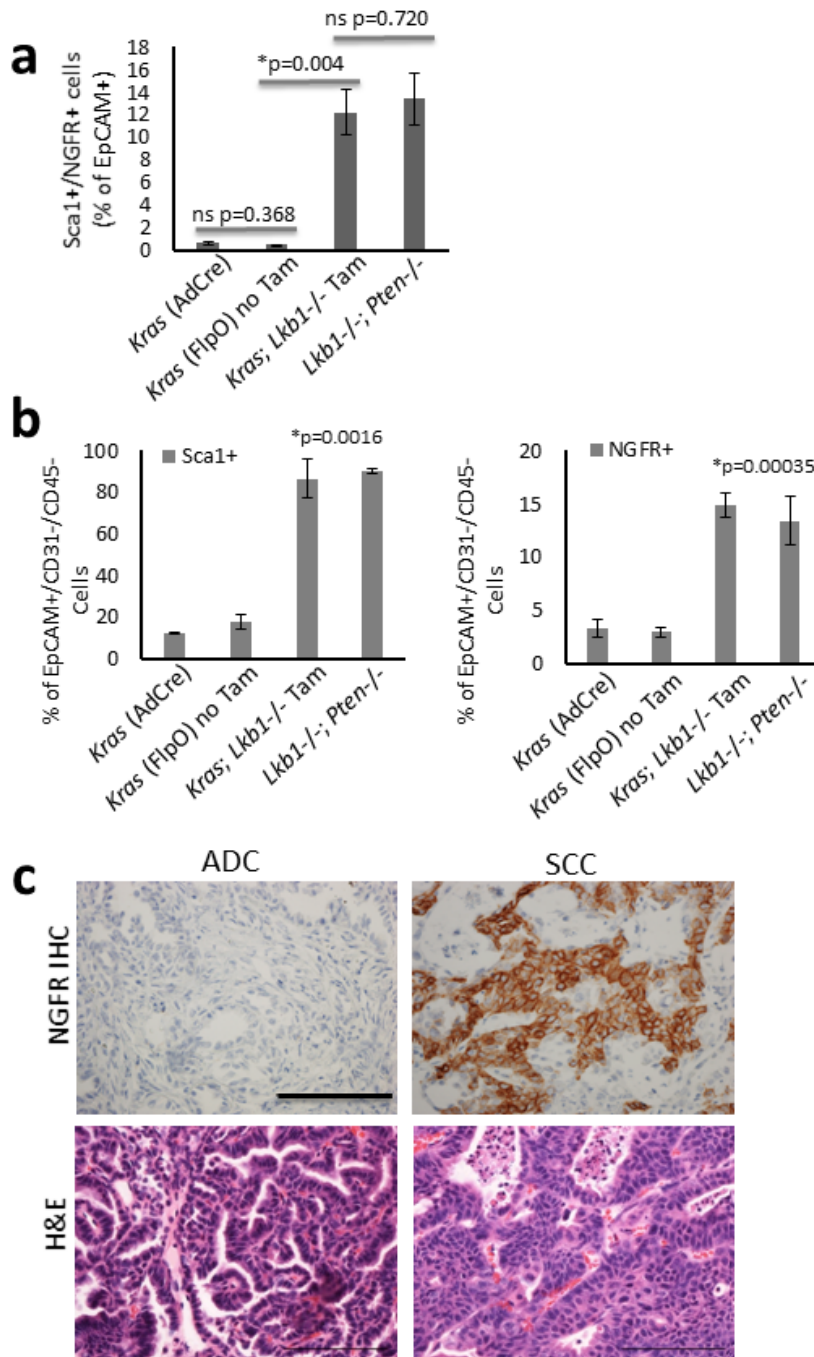

**Supplementary Figure 2: *Lkb1* deletion after transplant of KRAS adenocarcinoma cells drives SCC transition**

**a)** Flow cytometric analysis for average percentage of NGFR<sup>+</sup>/Sca1<sup>+</sup> cells within the DAPI<sup>-</sup>/CD31<sup>-</sup>/CD45<sup>-</sup>/EpCAM<sup>+</sup> of freshly dissociated tumors. Mean ± s.e.m. graphed, n=4 AdCre KRAS, n=3 no Tam, n=4 Tam, n=3 *Lkb1/Pten*, p values indicated on figure. **b)** Flow cytometric analysis for Sca1 and NGFR expression on the DAPI<sup>-</sup>/CD45<sup>-</sup>/CD31<sup>-</sup>/EpCAM<sup>+</sup> cells of dissociated tumors from the indicated cohorts, mean ± s.e.m. graphed, n=4 AdCre KRAS, n=3 no Tam, n=4 Tam, n=3 *Lkb1/Pten*, p values for no Tam vs Tam comparison indicated on figure. **c)** Serial sections of hematoxylin and eosin staining of tumors paired with immunohistochemistry for NGFR, marking some epithelial cells in the post tamoxifen tumors, scale bar = 50µm.

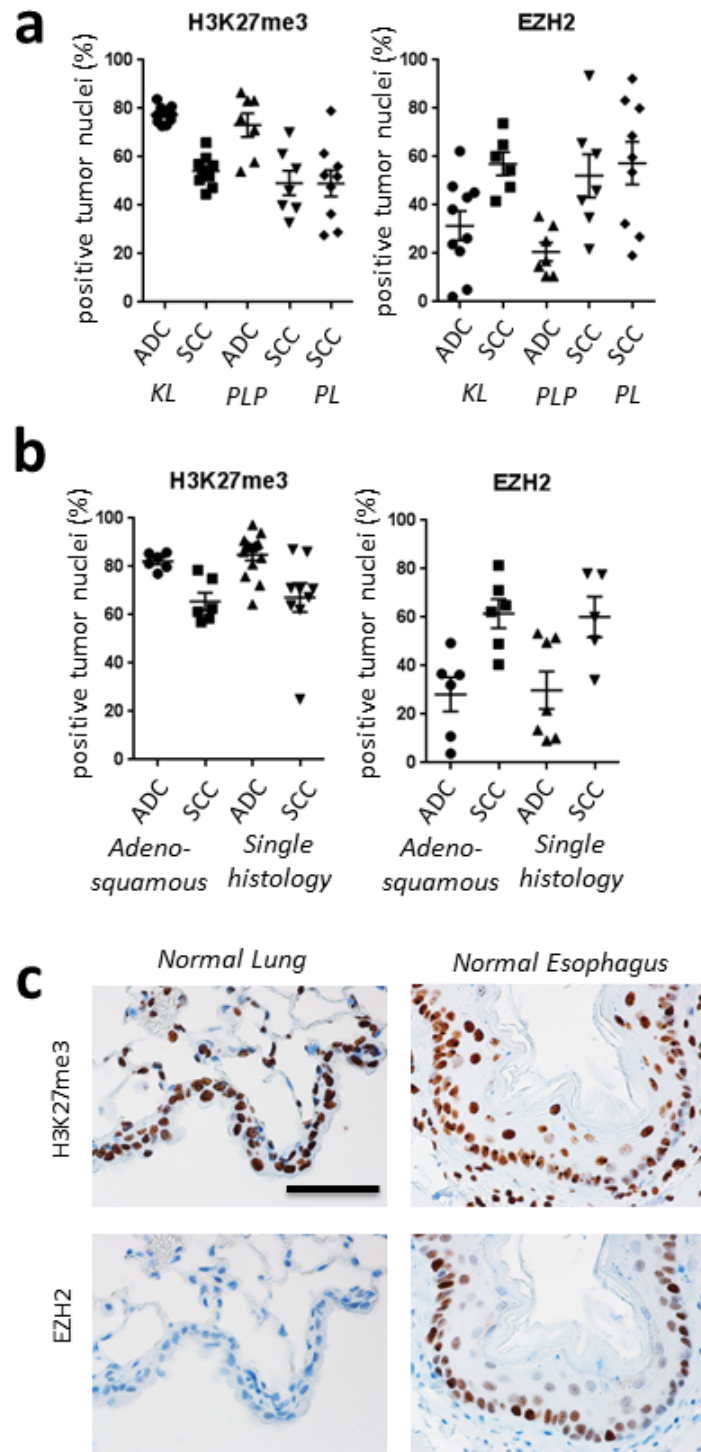

**Supplementary Figure 3: Loss of histone H3 lysine 27 trimethylation accompanies SCC transition**  
**a+b)** More detailed graphical representation of the immunohistochemistry quantifications for EZH2 and H3K27me3 expression in the indicated tumor sections, **a)** murine tumors, **b)** human tumors. Mean  $\pm$  s.e.m. graphed and each n can be observed on the graphs. **c)** Serial sections of immunohistochemistry for EZH2 and H3K27me3 in normal murine distal lung and esophagus, scale bar = 50 $\mu$ m.

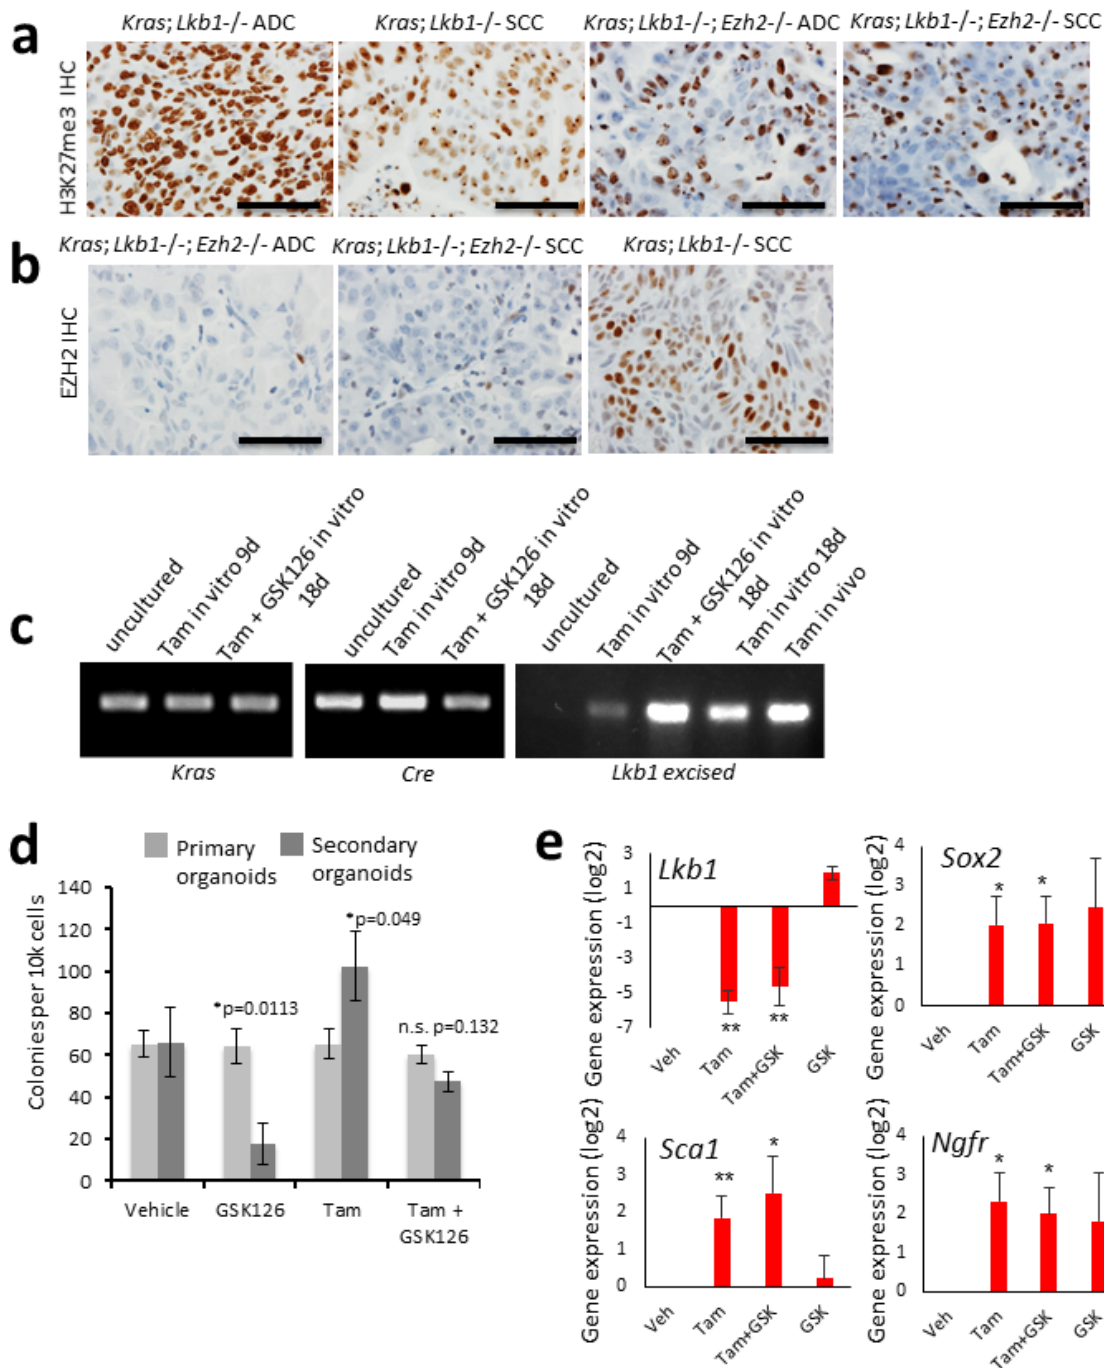

#### Supplementary Figure 4: Deletion or inhibition of EZH2 potentiates SCC transition

**a)** Immunohistochemistry for H3K27me3 in tumors of the indicated genotypes, scale bar = 50µm.

**b)** Immunohistochemistry for EZH2 in tumors of the indicated genotypes, scale bar = 50µm. **c)** PCR for alleles from the 3D tumor organoid cultures with the indicated treatments, *Kras* and *Cre* shown as controls, the excised *Lkb1* band is only present with tamoxifen treatment. **d)** Average number of colonies per 10,000 cells plated in the 3D cultures in the indicated treatments, mean ± s.e.m. graphed, n=5 for primary cultures, n=3 for secondary cultures, p values indicated on figure. **e)** RT-qPCR for *Sox2*, *Sca1* and *Lkb1* in secondary tumor organoid 3D cultures treated with 100nM tamoxifen, 5µM of EZH2 inhibitor GSK126, or both for 18-24 days total, mean ± s.e.m. on log<sub>2</sub> scale is graphed, \*\* indicates p<0.01, \* indicates p<0.05, n=4 except for GSK, n=2.



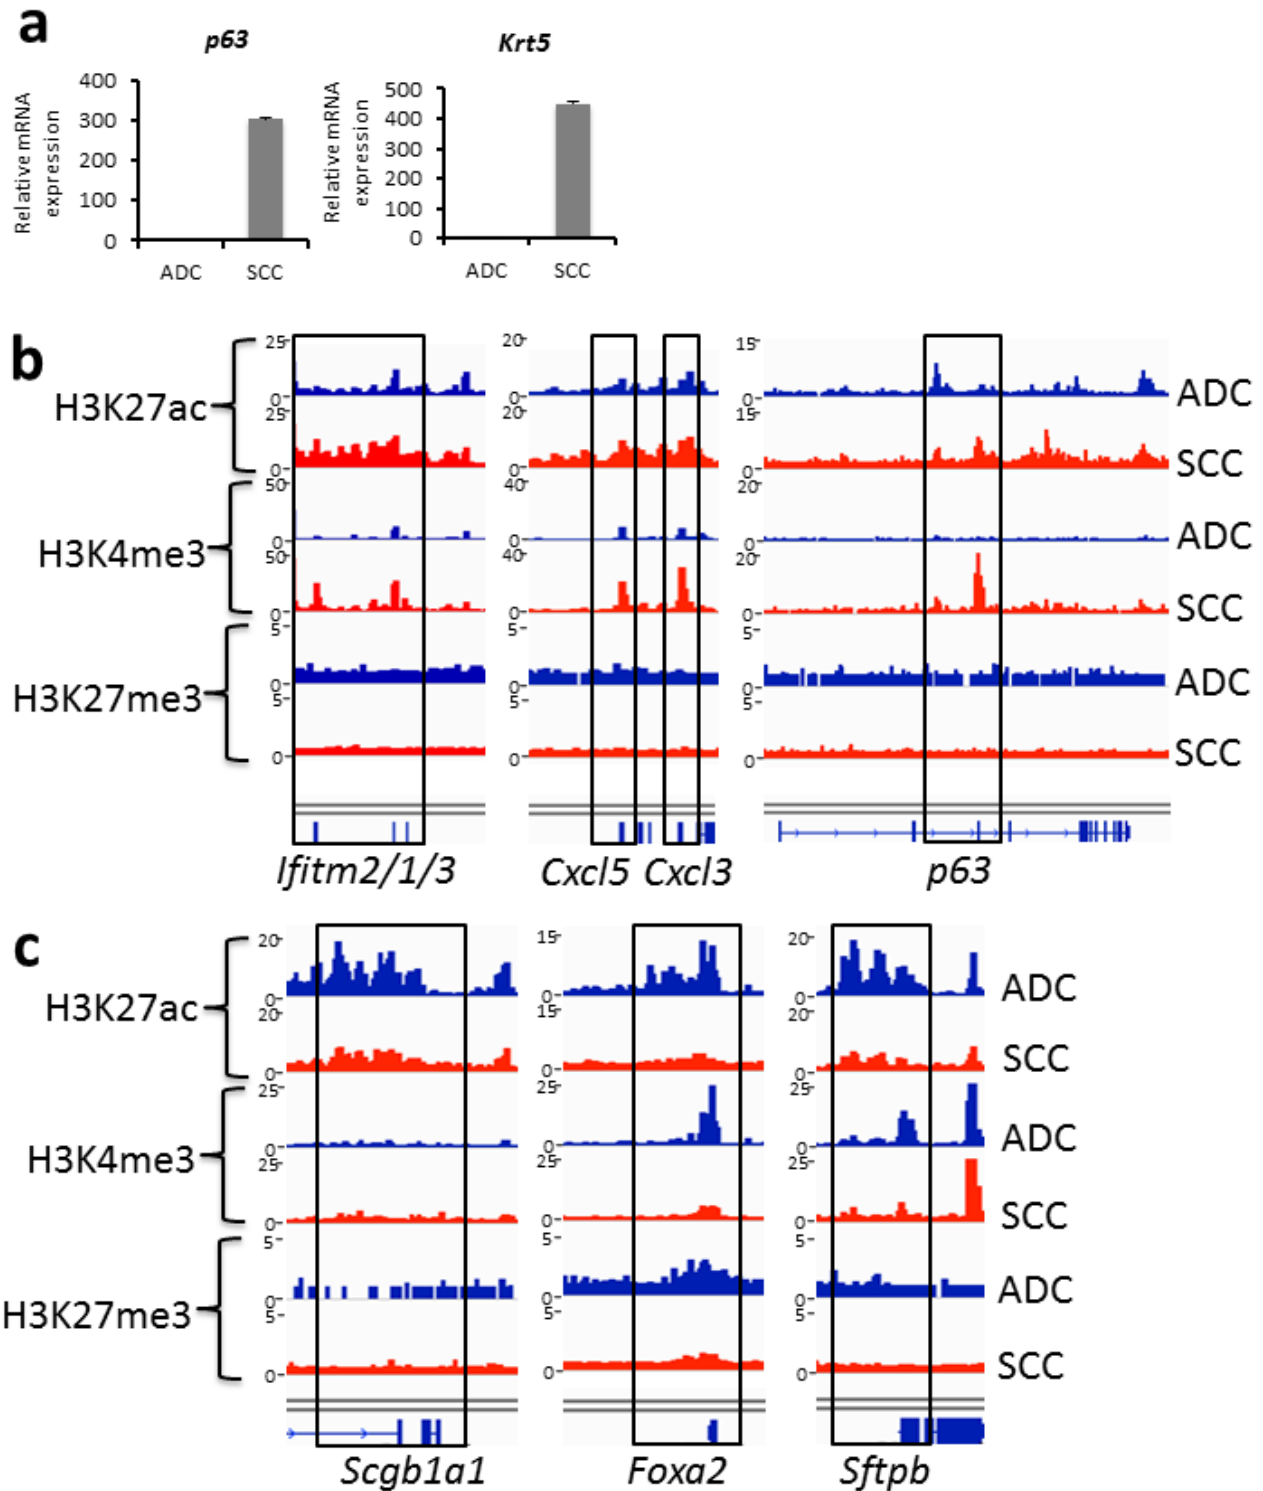

**Supplementary Figure 5: Chromatin landscapes of ADC and SCCs reveal de-repression of squamous genes**

**a)** RT-qPCR for expression the squamous genes *p63* and *Krt5* to confirm subtypes of tumors used for ChIP experiments. **b)** Genome browser snapshots of the squamous loci *Ifitm3*, *Cxcl3/5* and *p63* with the indicated ChIP-sequencing peaks for H3K27ac, H3K27me3 and H3K4me3 in the ADC (blue) and SCC (red) KRAS/*Lkb1* tumor samples. **c)** Genome browser snapshots of the squamous loci *Scgb1a1*, *Foxa2* and *Sftpb* with the indicated ChIP-sequencing peaks for H3K27ac, H3K27me3 and H3K4me3 in the ADC (blue) and SCC (red) KRAS/*Lkb1* tumor samples.

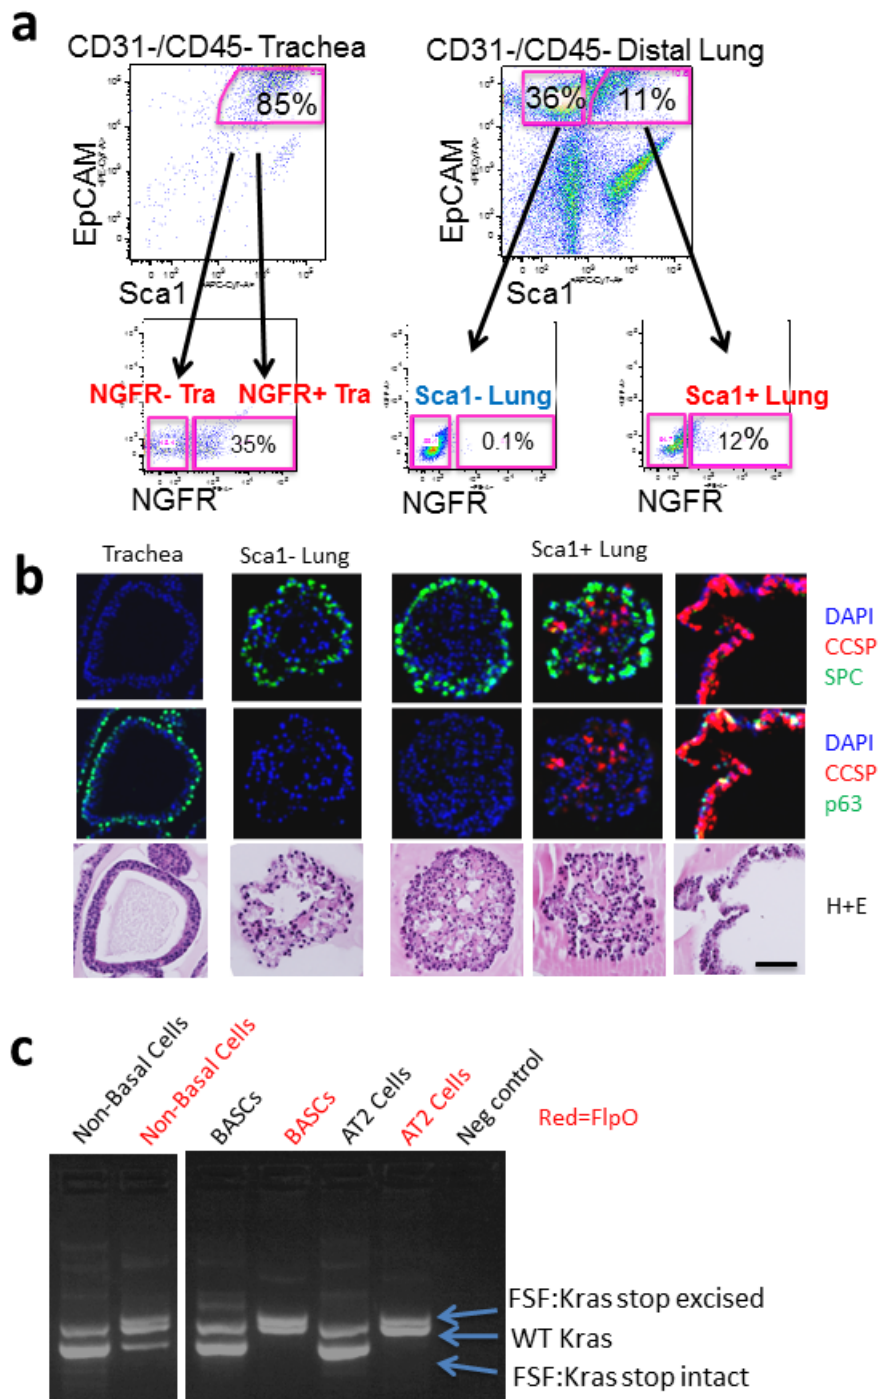

**Supplementary Figure 6: KRAS activation is tolerated by Club Cell, BASC and AT2 Cell populations**

**a)** Flow cytometry scheme for isolating stem and progenitor populations. Basal cells are isolated from tracheal cell preparations by exclusion of CD31 and CD45, and gating on EpCAM<sup>+</sup>, Sca1<sup>+</sup> and NGFR<sup>+</sup> cells. Non-basal cells are EpCAM<sup>+</sup> and Sca1<sup>+</sup> but NGFR<sup>-</sup>. In the distal lung preparations, again CD31 and CD45 are excluded, prior to gating on EpCAM<sup>+</sup> cells. Sca1<sup>-</sup> cells are enriched for AT2 cells, which are uniformly NGFR<sup>-</sup> in the normal mouse. BASCs are Sca1<sup>+</sup> and some express NGFR. We used both NGFR<sup>+</sup> and NGFR<sup>-</sup> BASCs for our experiments. **b)** Representative immunofluorescence for the cell lineage markers CCSP, SPC and p63 in indicated organoid cultures sections with hematoxylin and eosin staining below, scale bar = 50 $\mu$ m. **c)** PCR for *Kras* excision in organoid cultures derived from the indicated sorted lung cell populations.

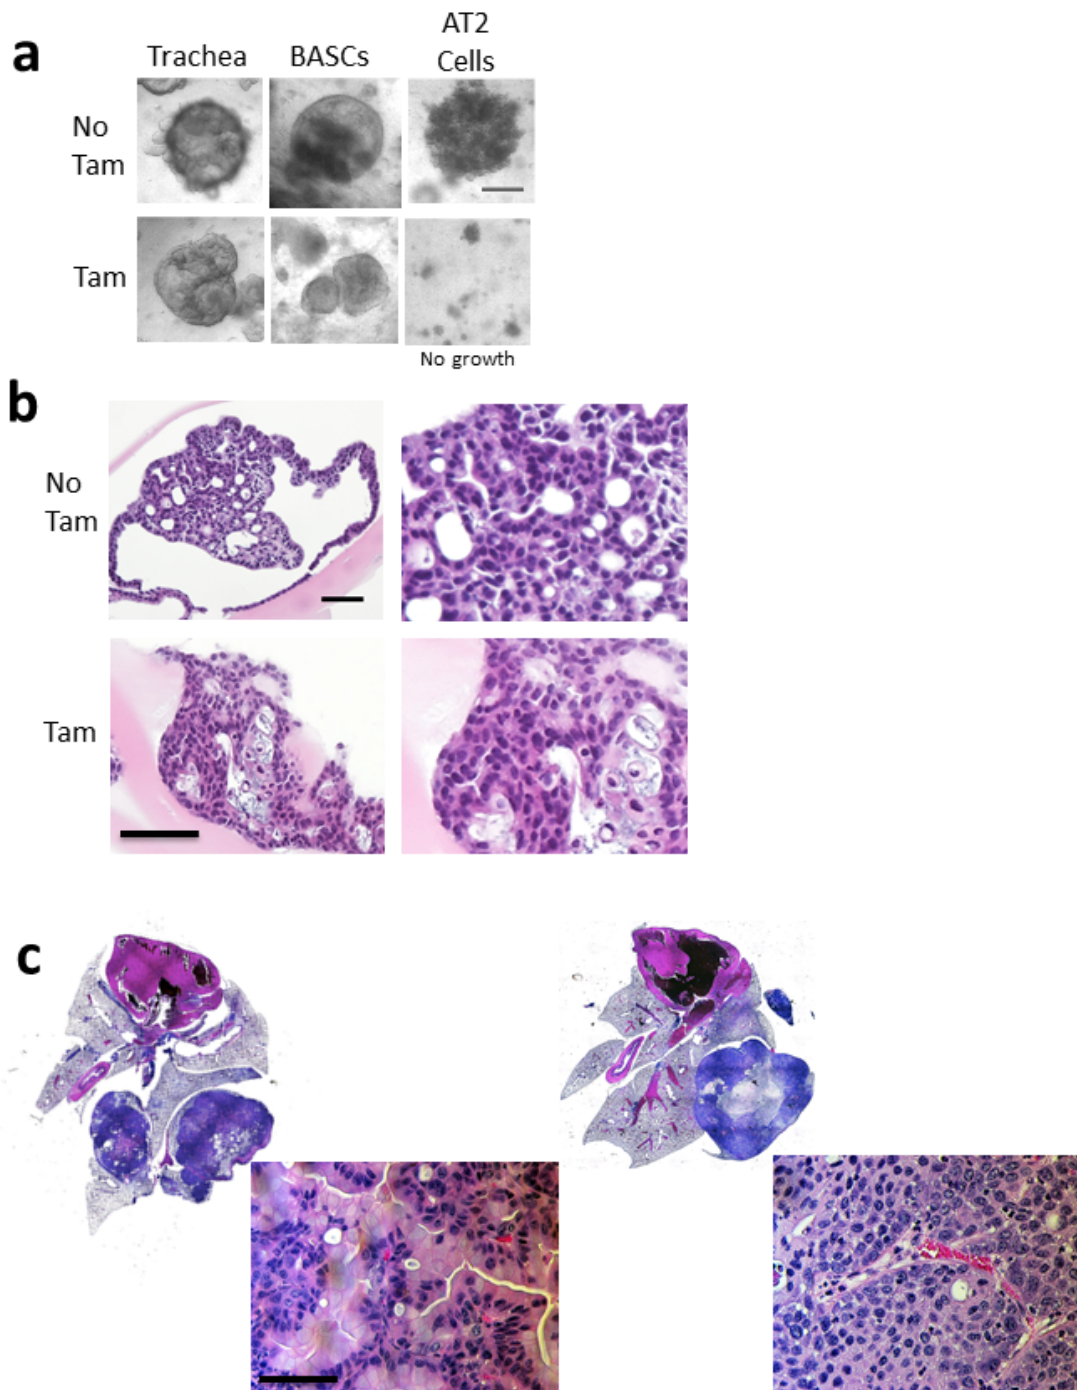

**Supplementary Figure 7: *Lkb1* Deletion Drives Squamous Transition of Club Cell- and BASC-derived *KRAS*<sup>+</sup> populations**

**a)** Representative brightfield images of *KRAS*<sup>+</sup> colonies from the indicated cell types, scale bar = 100 $\mu$ m. **b)** Representative hematoxylin and eosin staining of sections from tracheal derived organoids treated with the indicated tamoxifen or not for 9 days, scale bar = 100 $\mu$ m. **c)** Whole lung histology, with representative images of magnified histology of the tumor from each lung, from BASC derived orthotopically transplanted *KRAS/Lkb1* cells, scale bar = 50 $\mu$ m.

## Supplementary Table 1: *Unique H3K27ac peaks in SCC samples*

*Unique somatic peaks associated with protein coding genes, top 185 of a possible 246 with Log2FC>2.5, p value<1E-10*

| LOG2FC | Negative LOG10 (p value) | Gene Name | Gene Description                                                               |
|--------|--------------------------|-----------|--------------------------------------------------------------------------------|
| 6.259  | 300.000                  | Tmem45b   | transmembrane protein 45b                                                      |
| 5.987  | 300.000                  | Mroh5     | maestro heat-like repeat family member 5                                       |
| 5.985  | 275.755                  | Pitx1     | paired-like homeodomain transcription factor 1                                 |
| 5.704  | 71.065                   | Pitx1     | paired-like homeodomain transcription factor 1                                 |
| 5.496  | 25.304                   | Chst9     | carbohydrate (N-acetylgalactosamine 4-0) sulfotransferase 9                    |
| 5.496  | 25.304                   | Fut9      | fucosyltransferase 9                                                           |
| 5.183  | 29.366                   | Foxd4     | forkhead box D4                                                                |
| 5.119  | 27.901                   | Dgkg      | diacylglycerol kinase, gamma                                                   |
| 5.099  | 44.700                   | Slitrk6   | SLIT and NTRK-like family, member 6                                            |
| 5.086  | 27.316                   | Tmprss11g | transmembrane protease, serine 11g                                             |
| 5.018  | 25.854                   | Barx2     | BarH-like homeobox 2                                                           |
| 4.915  | 38.893                   | Chst9     | carbohydrate (N-acetylgalactosamine 4-0) sulfotransferase 9                    |
| 4.841  | 36.578                   | Fabp12    | fatty acid binding protein 12                                                  |
| 4.716  | 20.612                   | Chst9     | carbohydrate (N-acetylgalactosamine 4-0) sulfotransferase 9                    |
| 4.683  | 32.252                   | Cpne8     | copine VIII                                                                    |
| 4.671  | 25.993                   | Ccdc91    | coiled-coil domain containing 91                                               |
| 4.603  | 24.552                   | Car12     | carbonic anhydrase 12                                                          |
| 4.594  | 104.904                  | Engase    | endo-beta-N-acetylglucosaminidase                                              |
| 4.588  | 18.584                   | Sox2      | SRY (sex determining region Y)-box 2                                           |
| 4.415  | 26.237                   | Gpr115    | G protein-coupled receptor 115                                                 |
| 4.381  | 20.538                   | A1bg      | alpha-1-B glycoprotein                                                         |
| 4.335  | 29.096                   | Tnc       | tenascin C                                                                     |
| 4.304  | 32.817                   | Lbx1      | ladybird homeobox homolog 1 (Drosophila)                                       |
| 4.273  | 40.836                   | Pyroxd1   | pyridine nucleotide-disulphide oxidoreductase domain 1                         |
| 4.262  | 49.142                   | Ndfip2    | Nedd4 family interacting protein 2                                             |
| 4.210  | 22.261                   | Hlf       | hepatic leukemia factor                                                        |
| 4.179  | 78.192                   | Pitx1     | paired-like homeodomain transcription factor 1                                 |
| 4.174  | 21.414                   | Pitx1     | paired-like homeodomain transcription factor 1                                 |
| 4.098  | 20.287                   | Tmprss11a | transmembrane protease, serine 11a                                             |
| 4.074  | 89.946                   | Ccdc91    | coiled-coil domain containing 91                                               |
| 4.053  | 95.768                   | S100a9    | S100 calcium binding protein A9 (calgranulin B)                                |
| 4.035  | 15.713                   | Mfsd10    | major facilitator superfamily domain containing 10                             |
| 4.023  | 26.079                   | Cpne8     | copine VIII                                                                    |
| 3.890  | 26.490                   | Tmprss11g | transmembrane protease, serine 11g                                             |
| 3.800  | 24.287                   | Pthlh     | parathyroid hormone-like peptide                                               |
| 3.796  | 18.456                   | Irf5      | interferon regulatory factor 5                                                 |
| 3.796  | 18.456                   | Tmprss11g | transmembrane protease, serine 11g                                             |
| 3.796  | 21.371                   | Secisbp2  | SECIS binding protein 2                                                        |
| 3.796  | 21.371                   | Sord      | sorbitol dehydrogenase                                                         |
| 3.713  | 14.714                   | Marcks    | myristoylated alanine rich protein kinase C substrate                          |
| 3.703  | 43.557                   | Ehf       | ets homologous factor                                                          |
| 3.699  | 38.259                   | Six1      | sine oculis-related homeobox 1                                                 |
| 3.686  | 58.643                   | Phospho1  | phosphatase, orphan 1                                                          |
| 3.679  | 61.023                   | S100a9    | S100 calcium binding protein A9 (calgranulin B)                                |
| 3.658  | 82.717                   | Helt      | helt bHLH transcription factor                                                 |
| 3.652  | 28.958                   | Prl2c5    | prolactin family 2, subfamily c, member 5                                      |
| 3.635  | 85.867                   | S100a9    | S100 calcium binding protein A9 (calgranulin B)                                |
| 3.588  | 39.244                   | Cdh6      | cadherin 6                                                                     |
| 3.564  | 12.796                   | Sc5d      | sterol-C5-desaturase (fungal ERG3, delta-5-desaturase) homolog (S. cerevisiae) |
| 3.517  | 25.727                   | Pthlh     | parathyroid hormone-like peptide                                               |
| 3.503  | 49.531                   | S100a8    | S100 calcium binding protein A8 (calgranulin A)                                |
| 3.501  | 32.071                   | Pyroxd1   | pyridine nucleotide-disulphide oxidoreductase domain 1                         |
| 3.501  | 27.573                   | Trp63     | transformation related protein 63                                              |
| 3.496  | 18.582                   | Zfand2b   | zinc finger, AN1 type domain 2B                                                |
| 3.489  | 25.191                   | Rps23     | ribosomal protein S23                                                          |
| 3.452  | 15.932                   | Frmf6     | FERM domain containing 6                                                       |
| 3.450  | 13.820                   | Capns2    | calpain, small subunit 2                                                       |
| 3.437  | 44.498                   | Ehf       | ets homologous factor                                                          |
| 3.425  | 31.794                   | Ppp1r3b   | protein phosphatase 1, regulatory (inhibitor) subunit 3B                       |
| 3.418  | 41.852                   | Olf52     | olfactory receptor 52                                                          |
| 3.398  | 37.089                   | S100a9    | S100 calcium binding protein A9 (calgranulin B)                                |
| 3.366  | 14.595                   | Rcn1      | reticulocalbin 1                                                               |
| 3.352  | 12.479                   | Amotl1    | angiomin-like 1                                                                |
| 3.342  | 16.180                   | C9        | complement component 9                                                         |
| 3.342  | 16.180                   | Ccdc91    | coiled-coil domain containing 91                                               |
| 3.340  | 21.739                   | Fbxl14    | F-box and leucine-rich repeat protein 14                                       |
| 3.332  | 31.012                   | Gm5483    | predicted gene 5483                                                            |
| 3.326  | 17.768                   | Il1b      | interleukin 1 beta                                                             |



|       |         |               |                                                               |
|-------|---------|---------------|---------------------------------------------------------------|
| 3.305 | 37.649  | Gm5483        | predicted gene 5483                                           |
| 3.290 | 31.559  | Tnc           | tenascin C                                                    |
| 3.281 | 18.833  | Qsox2         | quiescin Q6 sulfhydryl oxidase 2                              |
| 3.276 | 22.281  | Cpeb2         | cytoplasmic polyadenylation element binding protein 2         |
| 3.275 | 13.534  | Rps23         | ribosomal protein S23                                         |
| 3.259 | 15.124  | Arhgap5       | Rho GTPase activating protein 5                               |
| 3.259 | 15.124  | Gab1          | growth factor receptor bound protein 2-associated protein 1   |
| 3.248 | 23.614  | Pitx1         | paired-like homeodomain transcription factor 1                |
| 3.248 | 23.614  | Ranbp6        | RAN binding protein 6                                         |
| 3.246 | 18.309  | Ipcef1        | interaction protein for cytohesin exchange factors 1          |
| 3.246 | 18.309  | Rbbp6         | retinoblastoma binding protein 6                              |
| 3.217 | 14.336  | Chac1         | ChaC, cation transport regulator 1                            |
| 3.217 | 14.336  | Entpd3        | ectonucleoside triphosphate diphosphohydrolase 3              |
| 3.217 | 14.336  | Perp          | PERP, TP53 apoptosis effector                                 |
| 3.203 | 47.308  | Vsn1          | visinin-like 1                                                |
| 3.200 | 175.564 | Csf3r         | colony stimulating factor 3 receptor (granulocyte)            |
| 3.197 | 23.911  | Il1b          | interleukin 1 beta                                            |
| 3.191 | 40.144  | Il1r2         | interleukin 1 receptor, type II                               |
| 3.189 | 53.185  | Supt20        | suppressor of Ty 20                                           |
| 3.174 | 17.005  | Irf6          | interferon regulatory factor 6                                |
| 3.166 | 263.729 | Csf3r         | colony stimulating factor 3 receptor (granulocyte)            |
| 3.165 | 48.704  | Cpeb2         | cytoplasmic polyadenylation element binding protein 2         |
| 3.164 | 32.722  | Trp63         | transformation related protein 63                             |
| 3.160 | 21.537  | Oasl2         | 2'-5' oligoadenylate synthetase-like 2                        |
| 3.160 | 21.537  | Pthlh         | parathyroid hormone-like peptide                              |
| 3.119 | 19.166  | Irg1          | immunoresponsive gene 1                                       |
| 3.099 | 20.250  | Bcl2l15       | BCL2-like 15                                                  |
| 3.093 | 32.016  | Fam122a       | family with sequence similarity 122, member A                 |
| 3.088 | 33.359  | Tas2r126      | taste receptor, type 2, member 126                            |
| 3.069 | 60.172  | Cdca7         | cell division cycle associated 7                              |
| 3.060 | 15.199  | Gzmk          | granzyme K                                                    |
| 3.060 | 15.199  | Slamf6        | SLAM family member 6                                          |
| 3.059 | 23.768  | Oacyl         | O-acyltransferase like                                        |
| 3.055 | 29.399  | Slco1a6       | solute carrier organic anion transporter family, member 1a6   |
| 3.053 | 74.967  | Upp1          | uridine phosphorylase 1                                       |
| 3.052 | 18.140  | Rps27a        | ribosomal protein S27A                                        |
| 3.036 | 16.286  | Tmppe         | transmembrane protein with metallophosphoesterase domain      |
| 3.032 | 23.260  | Tbc1d8        | TBC1 domain family, member 8                                  |
| 3.021 | 51.760  | S100a9        | S100 calcium binding protein A9 (calgranulin B)               |
| 3.019 | 50.415  | Ptpn22        | protein tyrosine phosphatase, non-receptor type 22 (lymphoid) |
| 3.018 | 25.695  | Il1b          | interleukin 1 beta                                            |
| 3.018 | 17.375  | 1810011O10Rik | RIKEN cDNA 1810011O10 gene                                    |
| 3.013 | 59.582  | S100a8        | S100 calcium binding protein A8 (calgranulin A)               |
| 3.011 | 96.166  | Ccdc91        | coiled-coil domain containing 91                              |
| 2.983 | 32.758  | Zfyve26       | zinc finger, FYVE domain containing 26                        |
| 2.972 | 23.088  | Krt5          | keratin 5                                                     |
| 2.970 | 17.959  | Dgkh          | diacylglycerol kinase, eta                                    |
| 2.963 | 26.873  | Iyd           | iodotyrosine deiodinase                                       |
| 2.962 | 28.219  | Ccpg1         | cell cycle progression 1                                      |
| 2.961 | 15.269  | Syt6          | synaptotagmin VI                                              |
| 2.952 | 68.786  | Csf3r         | colony stimulating factor 3 receptor (granulocyte)            |
| 2.948 | 35.292  | Mmp25         | matrix metalloproteinase 25                                   |
| 2.940 | 25.026  | Marcks        | myristoylated alanine rich protein kinase C substrate         |
| 2.932 | 74.870  | Klhl6         | kelch-like 6                                                  |
| 2.923 | 89.032  | Tas2r143      | taste receptor, type 2, member 143                            |
| 2.902 | 16.701  | Grhl1         | grainyhead-like 1 (Drosophila)                                |
| 2.897 | 17.797  | Tbcd          | tubulin-specific chaperone d                                  |
| 2.893 | 18.893  | Meis2         | Meis homeobox 2                                               |
| 2.890 | 20.238  | Cxcl2         | chemokine (C-X-C motif) ligand 2                              |
| 2.890 | 75.192  | Il1r2         | interleukin 1 receptor, type II                               |
| 2.880 | 113.658 | Bcl2l15       | BCL2-like 15                                                  |
| 2.876 | 171.180 | Zfp715        | zinc finger protein 715                                       |
| 2.868 | 31.460  | Musk          | muscle, skeletal, receptor tyrosine kinase                    |
| 2.864 | 34.754  | Cpeb2         | cytoplasmic polyadenylation element binding protein 2         |
| 2.861 | 18.395  | Ehf           | ets homologous factor                                         |
| 2.861 | 18.395  | Gm17455       | predicted gene, 17455                                         |
| 2.845 | 24.981  | Eea1          | early endosome antigen 1                                      |
| 2.843 | 92.263  | Il1b          | interleukin 1 beta                                            |
| 2.842 | 13.510  | Jazf1         | JAZF zinc finger 1                                            |
| 2.836 | 28.029  | Pvrl1         | poliovirus receptor-related 1                                 |
| 2.835 | 14.606  | Gxylt1        | glucoside xylosyltransferase 1                                |
| 2.824 | 144.041 | Ifitm3        | interferon induced transmembrane protein 3                    |
| 2.824 | 45.610  | Kdm2a         | lysine (K)-specific demethylase 2A                            |
| 2.814 | 27.538  | Oasl2         | 2'-5' oligoadenylate synthetase-like 2                        |
| 2.786 | 34.251  | Pdzd2         | PDZ domain containing 2                                       |
| 2.785 | 38.404  | Rassf6        | Ras association (RalGDS/AF-6) domain family member 6          |
| 2.784 | 21.307  | Cdca7         | cell division cycle associated 7                              |
| 2.778 | 24.359  | Marcks        | myristoylated alanine rich protein kinase C substrate         |

|       |         |           |                                                                          |
|-------|---------|-----------|--------------------------------------------------------------------------|
| 2.777 | 39.260  | Trp63     | transformation related protein 63                                        |
| 2.776 | 117.930 | Arhgap5   | Rho GTPase activating protein 5                                          |
| 2.764 | 16.666  | Acot1     | acyl-CoA thioesterase 1                                                  |
| 2.761 | 30.223  | Aff1      | activating transcription factor 1                                        |
| 2.760 | 11.419  | Serpinb10 | serine (or cysteine) peptidase inhibitor, clade B (ovalbumin), member 10 |
| 2.757 | 20.574  | Zfp715    | zinc finger protein 715                                                  |
| 2.749 | 32.792  | Cxcl5     | chemokine (C-X-C motif) ligand 5                                         |
| 2.745 | 22.528  | Fam122a   | family with sequence similarity 122, member A                            |

## Supplementary Table 2: Unique H3K4me3 peaks in SCC samples

Unique somatic peaks associated with protein coding genes, top 185 with an additional 1 selected locus, of a possible 584 with  $\text{Log2FC} > 1.4$ ,  $p \text{ value} < 1E-10$

| LOG2FC | Negative LOG10 (p value) | Gene Name | Gene Description                                         |
|--------|--------------------------|-----------|----------------------------------------------------------|
| 6.947  | 72.129                   | Tmprss11b | transmembrane protease, serine 11B                       |
| 6.101  | 207.438                  | Frmf6     | FERM domain containing 6                                 |
| 5.849  | 110.129                  | Ccdc91    | coiled-coil domain containing 91                         |
| 5.760  | 74.011                   | Cfap20    | cilia and flagella associated protein 20                 |
| 5.412  | 56.966                   | Tmprss11g | transmembrane protease, serine 11g                       |
| 5.171  | 157.277                  | Krt17     | keratin 17                                               |
| 5.108  | 53.837                   | Ppbp      | pro-platelet basic protein                               |
| 4.986  | 33.237                   | Dsc2      | desmocollin 2                                            |
| 4.790  | 35.134                   | Ptpm      | protein tyrosine phosphatase, receptor type, M           |
| 4.786  | 189.576                  | Slitrk6   | SLIT and NTRK-like family, member 6                      |
| 4.781  | 68.456                   | Foxd4     | forkhead box D4                                          |
| 4.774  | 28.015                   | Jazf1     | JAZF zinc finger 1                                       |
| 4.738  | 117.737                  | Dst       | dystonin                                                 |
| 4.542  | 89.523                   | Fat2      | FAT tumor suppressor homolog 2 (Drosophila)              |
| 4.523  | 50.179                   | Trp73     | transformation related protein 73                        |
| 4.476  | 58.742                   | Tmprss11g | transmembrane protease, serine 11g                       |
| 4.452  | 307.626                  | Trp63     | transformation related protein 63                        |
| 4.372  | 87.353                   | Arhgef16  | Rho guanine nucleotide exchange factor (GEF) 16          |
| 4.371  | 39.651                   | Arhgap30  | Rho GTPase activating protein 30                         |
| 4.271  | 45.129                   | Pkp1      | plakophilin 1                                            |
| 4.201  | 38.587                   | Pthlh     | parathyroid hormone-like peptide                         |
| 4.164  | 25.424                   | Rad51b    | RAD51 homolog B                                          |
| 4.134  | 28.595                   | Slc35c1   | solute carrier family 35, member C1                      |
| 4.130  | 315.651                  | Krt5      | keratin 5                                                |
| 4.112  | 69.998                   | Ccdc91    | coiled-coil domain containing 91                         |
| 4.098  | 141.072                  | Pthlh     | parathyroid hormone-like peptide                         |
| 3.974  | 21.504                   | Aqp4      | aquaporin 4                                              |
| 3.880  | 47.999                   | Amotl1    | angiomin-like 1                                          |
| 3.842  | 34.410                   | Il1b      | interleukin 1 beta                                       |
| 3.793  | 96.179                   | Pex10     | peroxisomal biogenesis factor 10                         |
| 3.786  | 253.246                  | Csf3r     | colony stimulating factor 3 receptor (granulocyte)       |
| 3.769  | 187.113                  | Grik3     | glutamate receptor, ionotropic, kainate 3                |
| 3.705  | 80.920                   | Spsb1     | splA/ryanodine receptor domain and SOCS box containing 1 |
| 3.685  | 27.394                   | Tmprss11b | transmembrane protease, serine 11B                       |
| 3.620  | 62.555                   | Adcyap1   | adenylate cyclase activating polypeptide 1               |
| 3.615  | 47.730                   | Padi3     | peptidyl arginine deiminase, type III                    |
| 3.611  | 125.555                  | Mrgpra2a  | MAS-related GPR, member A2A                              |
| 3.605  | 30.257                   | Tmpo      | thymopoietin                                             |
| 3.605  | 156.522                  | Irg1      | immunoresponsive gene 1                                  |
| 3.596  | 78.156                   | D1Ert622e | DNA segment, Chr 1, ERATO Doi 622, expressed             |
| 3.590  | 27.608                   | Sord      | sorbitol dehydrogenase                                   |
| 3.564  | 43.203                   | Dcaf4     | DDB1 and CUL4 associated factor 4                        |
| 3.557  | 140.324                  | Chst11    | carbohydrate sulfotransferase 11                         |
| 3.547  | 33.408                   | Cdk5rap1  | CDK5 regulatory subunit associated protein 1             |
| 3.525  | 52.978                   | S100a9    | S100 calcium binding protein A9 (calgranulin B)          |
| 3.519  | 97.433                   | Clca5     | chloride channel calcium activated 5                     |
| 3.503  | 45.299                   | Krt6b     | keratin 6B                                               |
| 3.494  | 125.745                  | Mrgpra2b  | MAS-related GPR, member A2B                              |
| 3.481  | 33.653                   | Bnc1      | basonuclin 1                                             |
| 3.464  | 164.921                  | Dsg3      | desmoglein 3                                             |
| 3.424  | 89.236                   | Cxcr2     | chemokine (C-X-C motif) receptor 2                       |
| 3.420  | 213.146                  | Spatc1    | spermatogenesis and centriole associated 1               |
| 3.415  | 59.854                   | S100a7a   | S100 calcium binding protein A7A                         |
| 3.408  | 245.205                  | Nlrp12    | NLR family, pyrin domain containing 12                   |
| 3.402  | 63.300                   | S100a8    | S100 calcium binding protein A8 (calgranulin A)          |
| 3.383  | 28.619                   | Pitx1     | paired-like homeodomain transcription factor 1           |
| 3.378  | 24.649                   | Tcerg1    | transcription elongation regulator 1 (CA150)             |
| 3.372  | 49.807                   | Galm      | galactose mutarotase                                     |
| 3.352  | 224.445                  | Amer2     | APC membrane recruitment 2                               |
| 3.350  | 33.392                   | Prickle2  | prickle homolog 2 (Drosophila)                           |

|       |         |            |                                                                                     |
|-------|---------|------------|-------------------------------------------------------------------------------------|
| 3.346 | 122.696 | Galt6      | UDP-N-acetyl-alpha-D-galactosamine:polypeptide N-acetylgalactosaminyltransferase 6  |
| 3.334 | 232.194 | Krt85      | keratin 85                                                                          |
| 3.334 | 32.868  | Gm884      | predicted gene 884                                                                  |
| 3.321 | 28.895  | Nlrp12     | NLR family, pyrin domain containing 12                                              |
| 3.320 | 95.441  | Retnlg     | resistin like gamma                                                                 |
| 3.301 | 30.226  | Amer2      | APC membrane recruitment 2                                                          |
| 3.280 | 63.405  | Serpinb10  | serine (or cysteine) peptidase inhibitor, clade B (ovalbumin), member 10            |
| 3.268 | 53.866  | Ltf        | lactotransferrin                                                                    |
| 3.239 | 286.676 | S100a8     | S100 calcium binding protein A8 (calgranulin A)                                     |
| 3.235 | 87.925  | Sik1       | salt inducible kinase 1                                                             |
| 3.235 | 87.925  | Stfa2l1    | stefin A2 like 1                                                                    |
| 3.235 | 55.506  | Asb7       | ankyrin repeat and SOCS box-containing 7                                            |
| 3.218 | 210.553 | S100a9     | S100 calcium binding protein A9 (calgranulin B)                                     |
| 3.218 | 22.833  | Dusp6      | dual specificity phosphatase 6                                                      |
| 3.217 | 51.278  | Pola2      | polymerase (DNA directed), alpha 2                                                  |
| 3.217 | 51.278  | Rassf6     | Ras association (RalGDS/AF-6) domain family member 6                                |
| 3.208 | 112.205 | Fabp5      | fatty acid binding protein 5, epidermal                                             |
| 3.178 | 23.652  | Prps111    | phosphoribosyl pyrophosphate synthetase 1-like 1                                    |
| 3.169 | 44.166  | Tmprss13   | transmembrane protease, serine 13                                                   |
| 3.140 | 30.610  | Cxcr1      | chemokine (C-X-C motif) receptor 1                                                  |
| 3.138 | 19.682  | Ptgdr      | prostaglandin D receptor                                                            |
| 3.137 | 41.286  | Ltf        | lactotransferrin                                                                    |
| 3.132 | 31.695  | AF251705   | cDNA sequence AF251705                                                              |
| 3.113 | 49.344  | Lin28a     | lin-28 homolog A (C. elegans)                                                       |
| 3.100 | 23.447  | Sgms2      | sphingomyelin synthase 2                                                            |
| 3.093 | 72.120  | Dmxl2      | Dmx-like 2                                                                          |
| 3.092 | 42.440  | Arfgef1    | ADP-ribosylation factor guanine nucleotide-exchange factor 1(brefeldin A-inhibited) |
| 3.091 | 24.534  | Pvrl1      | poliovirus receptor-related 1                                                       |
| 3.090 | 37.900  | Klhdc4     | kelch domain containing 4                                                           |
| 3.076 | 51.850  | Pdzd2      | PDZ domain containing 2                                                             |
| 3.062 | 30.997  | Fbln1      | fibulin 1                                                                           |
| 3.053 | 28.055  | Dmkn       | dermokine                                                                           |
| 3.050 | 63.195  | Asb7       | ankyrin repeat and SOCS box-containing 7                                            |
| 3.040 | 33.179  | Tmprss11e  | transmembrane protease, serine 11e                                                  |
| 3.040 | 26.202  | Tnfrsf1a   | tumor necrosis factor receptor superfamily, member 1a                               |
| 3.026 | 115.669 | Asprv1     | aspartic peptidase, retroviral-like 1                                               |
| 3.001 | 96.509  | Hcar2      | hydroxycarboxylic acid receptor 2                                                   |
| 2.985 | 48.656  | Dapl1      | death associated protein-like 1                                                     |
| 2.983 | 57.826  | Dgat2      | diacylglycerol O-acyltransferase 2                                                  |
| 2.980 | 123.616 | Slnf4      | schlafen 4                                                                          |
| 2.973 | 55.979  | Trak1      | trafficking protein, kinesin binding 1                                              |
| 2.953 | 36.888  | Hist2h2aa2 | histone cluster 2, H2aa2                                                            |
| 2.949 | 32.850  | Dmxl2      | Dmx-like 2                                                                          |
| 2.943 | 177.304 | Wfdc21     | WAP four-disulfide core domain 21                                                   |
| 2.941 | 19.894  | Sfn        | stratifin                                                                           |
| 2.932 | 147.702 | Il1f9      | interleukin 1 family, member 9                                                      |
| 2.932 | 51.042  | Gda        | guanine deaminase                                                                   |
| 2.924 | 68.142  | Hsd17b2    | hydroxysteroid (17-beta) dehydrogenase 2                                            |
| 2.906 | 25.372  | Ly6c2      | lymphocyte antigen 6 complex, locus C2                                              |
| 2.904 | 46.012  | Dennd4a    | DENN/MADD domain containing 4A                                                      |
| 2.892 | 18.893  | Bmp2k      | BMP2 inducible kinase                                                               |
| 2.880 | 73.354  | Styx11     | serine/threonine/tyrosine interacting-like 1                                        |
| 2.867 | 186.070 | Il1b       | interleukin 1 beta                                                                  |
| 2.836 | 16.801  | Plekhs1    | pleckstrin homology domain containing, family S member 1                            |
| 2.832 | 101.420 | Cd177      | CD177 antigen                                                                       |
| 2.823 | 43.412  | Pvrl1      | poliovirus receptor-related 1                                                       |
| 2.814 | 49.517  | BC117090   | cDNA sequence BC117090                                                              |
| 2.807 | 61.363  | Eef1a1     | eukaryotic translation elongation factor 1 alpha 1                                  |
| 2.790 | 22.406  | Gadd45b    | growth arrest and DNA-damage-inducible 45 beta                                      |
| 2.787 | 179.485 | Trim30b    | tripartite motif-containing 30B                                                     |
| 2.780 | 117.316 | Fam167a    | family with sequence similarity 167, member A                                       |
| 2.779 | 31.809  | BC100530   | cDNA sequence BC100530                                                              |
| 2.773 | 70.778  | Tnfsf14    | tumor necrosis factor (ligand) superfamily, member 14                               |
| 2.770 | 28.268  | Ppp1r42    | protein phosphatase 1, regulatory subunit 42                                        |
| 2.769 | 99.002  | Tarm1      | T cell-interacting, activating receptor on myeloid cells 1                          |
| 2.768 | 35.719  | Ear10      | eosinophil-associated, ribonuclease A family, member 10                             |
| 2.759 | 48.795  | Csf3r      | colony stimulating factor 3 receptor (granulocyte)                                  |
| 2.759 | 48.795  | Pcsk9      | proprotein convertase subtilisin/kexin type 9                                       |
| 2.756 | 175.633 | Eea1       | early endosome antigen 1                                                            |
| 2.754 | 235.515 | C1qtnf9    | C1q and tumor necrosis factor related protein 9                                     |
| 2.748 | 72.139  | Cep19      | centrosomal protein 19                                                              |
| 2.738 | 20.330  | Angpt2     | angiopoietin 2                                                                      |
| 2.731 | 23.142  | Psca       | prostate stem cell antigen                                                          |
| 2.728 | 89.644  | Meis2      | Meis homeobox 2                                                                     |
| 2.719 | 21.800  | Coq7       | demethyl-Q 7                                                                        |
| 2.718 | 80.613  | Mmp8       | matrix metalloproteinase 8                                                          |
| 2.716 | 130.265 | Chil1      | chitinase-like 1                                                                    |
| 2.708 | 52.252  | Marcks     | myristoylated alanine rich protein kinase C substrate                               |

|       |         |               |                                                                 |
|-------|---------|---------------|-----------------------------------------------------------------|
| 2.699 | 57.643  | Txn14b        | thioredoxin-like 4B                                             |
| 2.693 | 35.873  | Stfa2         | stefin A2                                                       |
| 2.690 | 65.613  | Gm5483        | predicted gene 5483                                             |
| 2.679 | 27.564  | Dusp6         | dual specificity phosphatase 6                                  |
| 2.673 | 70.290  | Syk           | spleen tyrosine kinase                                          |
| 2.660 | 144.920 | LOC100038947  | signal-regulatory protein beta 1-like                           |
| 2.654 | 41.789  | Srgn          | serglycin                                                       |
| 2.650 | 57.355  | Syne1         | spectrin repeat containing, nuclear envelope 1                  |
| 2.636 | 16.439  | Tmpo          | thymopoietin                                                    |
| 2.635 | 39.117  | Ofcc1         | orofacial cleft 1 candidate 1                                   |
| 2.619 | 47.243  | Rnf149        | ring finger protein 149                                         |
| 2.616 | 33.868  | Rnf157        | ring finger protein 157                                         |
| 2.615 | 19.636  | Trem1         | triggering receptor expressed on myeloid cells 1                |
| 2.606 | 143.525 | Pitx1         | paired-like homeodomain transcription factor 1                  |
| 2.604 | 87.911  | Arhgap32      | Rho GTPase activating protein 32                                |
| 2.599 | 234.960 | Gda           | guanine deaminase                                               |
| 2.595 | 26.901  | Pgbd5         | piggyBac transposable element derived 5                         |
| 2.593 | 19.160  | Pde6h         | phosphodiesterase 6H, cGMP-specific, cone, gamma                |
| 2.588 | 20.643  | B430306N03Rik | RIKEN cDNA B430306N03 gene                                      |
| 2.584 | 22.363  | Atl2          | atlastin GTPase 2                                               |
| 2.577 | 101.440 | Vsnl1         | visinin-like 1                                                  |
| 2.566 | 209.788 | Adam8         | a disintegrin and metallopeptidase domain 8                     |
| 2.564 | 23.612  | Zfp715        | zinc finger protein 715                                         |
| 2.560 | 208.154 | Clec4e        | C-type lectin domain family 4, member e                         |
| 2.552 | 229.681 | Il1b          | interleukin 1 beta                                              |
| 2.552 | 32.371  | Atxn7l3b      | ataxin 7-like 3B                                                |
| 2.551 | 42.228  | Eps8l3        | EPS8-like 3                                                     |
| 2.549 | 28.069  | Pak1          | p21 protein (Cdc42/Rac)-activated kinase 1                      |
| 2.548 | 26.348  | Erg           | avian erythroblastosis virus E-26 (v-ets) oncogene related      |
| 2.534 | 43.015  | Furin         | furin (paired basic amino acid cleaving enzyme)                 |
| 2.534 | 168.924 | Ifitm1        | interferon induced transmembrane protein 1                      |
| 2.527 | 253.776 | Mefv          | Mediterranean fever                                             |
| 2.526 | 19.465  | Pgs1          | phosphatidylglycerophosphate synthase 1                         |
| 2.525 | 146.954 | Trem1         | triggering receptor expressed on myeloid cells 1                |
| 2.522 | 102.658 | Hdac4         | histone deacetylase 4                                           |
| 2.518 | 39.108  | 2010002M12Rik | RIKEN cDNA 2010002M12 gene                                      |
| 2.513 | 41.224  | Rybp          | RING1 and YY1 binding protein                                   |
| 2.510 | 86.943  | Shisa5        | shisa homolog 5 (Xenopus laevis)                                |
| 2.507 | 53.596  | Fam134b       | family with sequence similarity 134, member B                   |
| 2.507 | 92.038  | Slc22a20      | solute carrier family 22 (organic anion transporter), member 20 |
| 2.504 | 64.249  | Hk3           | hexokinase 3                                                    |
| 2.497 | 139.982 | Lmnb1         | lamin B1                                                        |
| 2.497 | 128.237 | Gcnt1         | glucosaminyl (N-acetyl) transferase 1, core 2                   |
| 2.495 | 98.560  | Cd300ld       | CD300 molecule-like family member d                             |
| 2.493 | 27.925  | Notch2        | notch 2                                                         |
| 1.479 | 97.208  | Sox2          | SRY (sex determining region Y)-box 2                            |

### Supplementary Table 3: *Unique H3K27ac peaks in ADC samples*

*Unique somatic peaks associated with protein coding genes, top 185 and an additional 2 selected loci, of a possible 1820 with Log2FC>2.5, p value<1E-10*

| LOG2FC | Negative LOG10 (p value) | Gene Name     | Gene Description                                                |
|--------|--------------------------|---------------|-----------------------------------------------------------------|
| -7.845 | 51.798                   | Cobl          | cordon-bleu WH2 repeat                                          |
| -7.533 | 41.356                   | Tmem121       | transmembrane protein 121                                       |
| -7.260 | 33.913                   | Rdh14         | retinol dehydrogenase 14 (all-trans and 9-cis)                  |
| -6.938 | 26.786                   | Ppp3cc        | protein phosphatase 3, catalytic subunit, gamma isoform         |
| -6.923 | 26.489                   | Hecw1         | HECT, C2 and WW domain containing E3 ubiquitin protein ligase 1 |
| -6.892 | 25.896                   | Gm8369        | predicted gene 8369                                             |
| -6.861 | 25.304                   | Tmem121       | transmembrane protein 121                                       |
| -6.675 | 22.049                   | 1700071K01Rik | RIKEN cDNA 1700071K01 gene                                      |
| -6.543 | 19.982                   | 1110059E24Rik | RIKEN cDNA 1110059E24 gene                                      |
| -6.523 | 19.687                   | Fut8          | fucosyltransferase 8                                            |
| -6.462 | 18.802                   | Crb2          | crumbs homolog 2 (Drosophila)                                   |
| -6.440 | 18.507                   | Kcnk1         | potassium channel, subfamily K, member 1                        |
| -6.419 | 18.213                   | Phtf2         | putative homeodomain transcription factor 2                     |
| -6.397 | 17.918                   | Gm8369        | predicted gene 8369                                             |
| -6.353 | 17.330                   | Fgfr1         | fibroblast growth factor receptor 1                             |
| -6.330 | 17.036                   | Usp12         | ubiquitin specific peptidase 12                                 |
| -6.284 | 16.448                   | Socs1         | suppressor of cytokine signaling 1                              |
| -6.211 | 15.567                   | Sall4         | sal-like 4 (Drosophila)                                         |
| -6.186 | 15.273                   | Grap2         | GRB2-related adaptor protein 2                                  |
| -6.160 | 14.980                   | Spry4         | sprouty homolog 4 (Drosophila)                                  |



|        |        |               |                                                                                          |
|--------|--------|---------------|------------------------------------------------------------------------------------------|
| -6.108 | 14.394 | Epha4         | Eph receptor A4                                                                          |
| -6.108 | 14.394 | Ets1          | E26 avian leukemia oncogene 1, 5' domain                                                 |
| -6.108 | 14.394 | Tmem123       | transmembrane protein 123                                                                |
| -6.081 | 14.101 | Tmem121       | transmembrane protein 121                                                                |
| -6.053 | 13.808 | Plekhh2       | pleckstrin homology domain containing, family H (with MyTH4 domain) member 2             |
| -6.025 | 13.516 | Luzp2         | leucine zipper protein 2                                                                 |
| -6.025 | 13.516 | Sult5a1       | sulfotransferase family 5A, member 1                                                     |
| -5.997 | 13.224 | Cr2           | complement receptor 2                                                                    |
| -5.997 | 13.224 | Usp15         | ubiquitin specific peptidase 15                                                          |
| -5.997 | 13.224 | Zfp703        | zinc finger protein 703                                                                  |
| -5.968 | 12.931 | Gm5082        | predicted gene 5082                                                                      |
| -5.968 | 12.931 | Sh2d2a        | SH2 domain protein 2A                                                                    |
| -5.968 | 12.931 | Tsen2         | tRNA splicing endonuclease 2 homolog (S. cerevisiae)                                     |
| -5.947 | 30.246 | Olf164        | olfactory receptor 164                                                                   |
| -5.938 | 12.639 | F2r1          | coagulation factor II (thrombin) receptor-like 1                                         |
| -5.938 | 12.639 | Isca2         | iron-sulfur cluster assembly 2 homolog (S. cerevisiae)                                   |
| -5.938 | 12.639 | Lingo2        | leucine rich repeat and Ig domain containing 2                                           |
| -5.938 | 12.639 | Npy           | neuropeptide Y                                                                           |
| -5.877 | 12.056 | Palld         | palladin, cytoskeletal associated protein                                                |
| -5.877 | 12.056 | Zfp354b       | zinc finger protein 354B                                                                 |
| -5.845 | 11.765 | Anp32a        | acidic (leucine-rich) nuclear phosphoprotein 32 family, member A                         |
| -5.845 | 11.765 | Cystm1        | cysteine-rich transmembrane module containing 1                                          |
| -5.845 | 11.765 | Osbpl6        | oxysterol binding protein-like 6                                                         |
| -5.845 | 11.765 | Slc2a7        | solute carrier family 2 (facilitated glucose transporter), member 7                      |
| -5.845 | 11.765 | Zswim6        | zinc finger SWIM-type containing 6                                                       |
| -5.841 | 27.901 | Nol11         | nucleolar protein 11                                                                     |
| -5.812 | 11.474 | Ddx10         | DEAD (Asp-Glu-Ala-Asp) box polypeptide 10                                                |
| -5.812 | 11.474 | Maf           | avian musculoaponeurotic fibrosarcoma (v-maf) AS42 oncogene homolog                      |
| -5.779 | 11.183 | Lyzl1         | lysozyme-like 1                                                                          |
| -5.779 | 11.183 | Sorbs1        | sorbin and SH3 domain containing 1                                                       |
| -5.779 | 11.183 | Tex36         | testis expressed 36                                                                      |
| -5.772 | 81.638 | Onecut2       | one cut domain, family member 2                                                          |
| -5.745 | 10.892 | Dad1          | defender against cell death 1                                                            |
| -5.745 | 10.892 | Etaa1         | Ewing tumor-associated antigen 1                                                         |
| -5.745 | 10.892 | Pde6a         | phosphodiesterase 6A, cGMP-specific, rod, alpha                                          |
| -5.745 | 10.892 | Zfp618        | zinc finger protein 618                                                                  |
| -5.741 | 25.854 | Onecut3       | one cut domain, family member 3                                                          |
| -5.711 | 10.602 | Abca5         | ATP-binding cassette, sub-family A (ABC1), member 5                                      |
| -5.711 | 10.602 | Ift122        | intraflagellar transport 122                                                             |
| -5.711 | 10.602 | Tekt2         | tektin 2                                                                                 |
| -5.697 | 24.978 | Sh2d1b1       | SH2 domain protein 1B1                                                                   |
| -5.675 | 10.311 | Bend5         | BEN domain containing 5                                                                  |
| -5.675 | 10.311 | Spdef         | SAM pointed domain containing ets transcription factor                                   |
| -5.638 | 10.021 | B3gnt7        | UDP-GlcNAc:betaGal beta-1,3-N-acetylglucosaminyltransferase 7                            |
| -5.638 | 10.021 | Gas2          | growth arrest specific 2                                                                 |
| -5.638 | 10.021 | Ptx3          | pentraxin related gene                                                                   |
| -5.638 | 10.021 | Slc19a3       | solute carrier family 19, member 3                                                       |
| -5.599 | 38.484 | Cryl1         | crystallin, lambda 1                                                                     |
| -5.552 | 53.161 | Ptprn2        | protein tyrosine phosphatase, receptor type, N polypeptide 2                             |
| -5.549 | 37.025 | Hao           | 3-hydroxyanthranilate 3,4-dioxygenase                                                    |
| -5.549 | 37.025 | Wfs1          | Wolfram syndrome 1 homolog (human)                                                       |
| -5.536 | 22.064 | Med13l        | mediator complex subunit 13-like                                                         |
| -5.484 | 21.192 | Otol1         | otolin 1 homolog (zebrafish)                                                             |
| -5.431 | 20.322 | Pla2r1        | phospholipase A2 receptor 1                                                              |
| -5.421 | 33.528 | Car8          | carbonic anhydrase 8                                                                     |
| -5.375 | 19.452 | Gldc          | glycine decarboxylase                                                                    |
| -5.356 | 19.163 | Tox3          | TOX high mobility group box family member 3                                              |
| -5.336 | 18.873 | Mettl15       | methyltransferase like 15                                                                |
| -5.316 | 30.912 | Ntm           | neurotrimin                                                                              |
| -5.304 | 30.622 | Col6a2        | collagen, type VI, alpha 2                                                               |
| -5.267 | 55.150 | Camk1g        | calcium/calmodulin-dependent protein kinase I gamma                                      |
| -5.234 | 53.705 | Mcpt8         | mast cell protease 8                                                                     |
| -5.204 | 28.304 | Lax1          | lymphocyte transmembrane adaptor 1                                                       |
| -5.171 | 16.564 | Ets1          | E26 avian leukemia oncogene 1, 5' domain                                                 |
| -5.171 | 16.564 | Nrsn1         | neurensin 1                                                                              |
| -5.157 | 50.531 | Alpi          | alkaline phosphatase, intestinal                                                         |
| -5.151 | 27.148 | Gcnt4         | glucosaminyl (N-acetyl) transferase 4, core 2 (beta-1,6-N-acetylglucosaminyltransferase) |
| -5.137 | 26.859 | Matn1         | matrilin 1, cartilage matrix protein                                                     |
| -5.127 | 15.989 | 4921539E11Rik | RIKEN cDNA 4921539E11 gene                                                               |
| -5.127 | 15.989 | 4930523C07Rik | RIKEN cDNA 4930523C07 gene                                                               |
| -5.127 | 15.989 | Dennd5b       | DENN/MADD domain containing 5B                                                           |
| -5.127 | 15.989 | Golt1a        | golgi transport 1 homolog A (S. cerevisiae)                                              |
| -5.127 | 15.989 | Ostf1         | osteoclast stimulating factor 1                                                          |
| -5.127 | 15.989 | Tprg          | transformation related protein 63 regulated                                              |
| -5.104 | 15.702 | Lpp           | LIM domain containing preferred translocation partner in lipoma                          |
| -5.081 | 15.415 | Pax5          | paired box 5                                                                             |
| -5.057 | 15.128 | Scml4         | sex comb on midleg-like 4 (Drosophila)                                                   |

|        |        |          |                                                              |
|--------|--------|----------|--------------------------------------------------------------|
| -5.057 | 15.128 | Snx29    | sorting nexin 29                                             |
| -5.034 | 14.841 | Cd209d   | CD209d antigen                                               |
| -5.034 | 14.841 | Tgfb2    | transforming growth factor, beta receptor II                 |
| -5.024 | 24.552 | Mei4     | meiosis-specific, MEI4 homolog (S. cerevisiae)               |
| -5.009 | 24.265 | Cdk5rap2 | CDK5 regulatory subunit associated protein 2                 |
| -4.985 | 14.268 | Plac9a   | placenta specific 9a                                         |
| -4.977 | 33.980 | Snx10    | sorting nexin 10                                             |
| -4.960 | 13.983 | Satb2    | special AT-rich sequence binding protein 2                   |
| -4.960 | 13.983 | St8sia3  | ST8 alpha-N-acetyl-neuraminide alpha-2,8-sialyltransferase 3 |
| -4.960 | 13.983 | Tmem121  | transmembrane protein 121                                    |
| -4.960 | 13.983 | Zfp1     | zinc finger protein, multitype 1                             |
| -4.949 | 23.115 | Proser2  | proline and serine rich 2                                    |
| -4.938 | 53.629 | Camk2n1  | calcium/calmodulin-dependent protein kinase II inhibitor 1   |
| -4.933 | 22.828 | Xylt1    | xylosyltransferase 1                                         |
| -4.917 | 22.541 | Acnat2   | acyl-coenzyme A amino acid N-acyltransferase 2               |
| -4.917 | 22.541 | Fam83d   | family with sequence similarity 83, member D                 |
| -4.908 | 13.412 | Clvs2    | clavesin 2                                                   |
| -4.908 | 13.412 | Nrip1    | nuclear receptor interacting protein 1                       |
| -4.908 | 13.412 | Raly1    | RALY RNA binding protein-like                                |
| -4.908 | 13.412 | Shh      | sonic hedgehog                                               |
| -4.901 | 22.254 | Serpind1 | serine (or cysteine) peptidase inhibitor, clade D, member 1  |
| -4.900 | 31.965 | R3hdml   | R3H domain containing-like                                   |
| -4.885 | 21.968 | Smad2    | SMAD family member 2                                         |
| -4.872 | 40.203 | Rph3a    | rabphilin 3A                                                 |
| -4.856 | 50.189 | Rasgrp1  | RAS guanyl releasing protein 1                               |
| -4.852 | 21.395 | Fam19a5  | family with sequence similarity 19, member A5                |
| -4.852 | 21.395 | Mboat2   | membrane bound O-acyltransferase domain containing 2         |
| -4.846 | 39.347 | Atp8b1   | ATPase, class I, type 8B, member 1                           |
| -4.837 | 39.062 | Ppie     | peptidylprolyl isomerase E (cyclophilin E)                   |
| -4.836 | 21.109 | Onecut3  | one cut domain, family member 3                              |
| -4.827 | 12.557 | Filip1l  | filamin A interacting protein 1-like                         |
| -4.827 | 12.557 | Mpg      | N-methylpurine-DNA glycosylase                               |
| -4.217 | 12.633 | Foxa2    | forkhead box A2                                              |
| -4.217 | 12.633 | Foxo1    | forkhead box O1                                              |

#### Supplementary Table 4: *Unique H3K4me3 peaks in ADC samples*

*Unique somatic peaks associated with protein coding genes, top 185 and an additional 2 selected loci, of a possible 2506 with Log2FC>1.4, p value<1E-10*

| LOG2FC | Negative LOG10 (p value) | Gene Name | Gene Description                                                                              |
|--------|--------------------------|-----------|-----------------------------------------------------------------------------------------------|
| -6.340 | 31.535                   | Adck3     | aarF domain containing kinase 3                                                               |
| -5.599 | 18.213                   | Slc12a7   | solute carrier family 12, member 7                                                            |
| -5.520 | 54.038                   | Paqr5     | progesterin and adipoQ receptor family member V                                               |
| -5.464 | 16.448                   | Tnfsf8    | tumor necrosis factor (ligand) superfamily, member 8                                          |
| -5.391 | 15.567                   | Klra17    | killer cell lectin-like receptor, subfamily A, member 17                                      |
| -5.261 | 14.101                   | Elavl4    | ELAV (embryonic lethal, abnormal vision, Drosophila)-like 4 (Hu antigen D)                    |
| -5.261 | 14.101                   | Map3k7    | mitogen-activated protein kinase kinase kinase 7                                              |
| -5.057 | 12.056                   | Nfatc3    | nuclear factor of activated T cells, cytoplasmic, calcineurin dependent 3                     |
| -4.961 | 22.254                   | Faim3     | Fas apoptotic inhibitory molecule 3                                                           |
| -4.896 | 21.109                   | Mylk      | myosin, light polypeptide kinase                                                              |
| -4.855 | 10.311                   | Pydc3     | pyrin domain containing 3                                                                     |
| -4.791 | 19.397                   | Sh2d1b1   | SH2 domain protein 1B1                                                                        |
| -4.773 | 19.112                   | Tank      | TRAF family member-associated Nf-kappa B activator                                            |
| -4.755 | 18.827                   | Sec16b    | SEC16 homolog B (S. cerevisiae)                                                               |
| -4.703 | 58.728                   | Mcpt1     | mast cell protease 1                                                                          |
| -4.662 | 8.865                    | Cadm4     | cell adhesion molecule 4                                                                      |
| -4.659 | 17.408                   | Scara5    | scavenger receptor class A, member 5 (putative)                                               |
| -4.621 | 8.577                    | Nt5c1a    | 5'-nucleotidase, cytosolic IA                                                                 |
| -4.619 | 16.842                   | Tmem54    | transmembrane protein 54                                                                      |
| -4.564 | 61.328                   | Rpia      | ribose 5-phosphate isomerase A                                                                |
| -4.536 | 15.713                   | Ankrd1    | ankyrin repeat domain 1 (cardiac muscle)                                                      |
| -4.536 | 15.713                   | Ubtd2     | ubiquitin domain containing 2                                                                 |
| -4.533 | 8.001                    | Agpat4    | 1-acylglycerol-3-phosphate O-acyltransferase 4 (lysophosphatidic acid acyltransferase, delta) |
| -4.470 | 14.869                   | Pax5      | paired box 5                                                                                  |
| -4.424 | 14.308                   | Klra18    | killer cell lectin-like receptor, subfamily A, member 18                                      |
| -4.386 | 69.408                   | Myof      | myoferlin                                                                                     |
| -4.380 | 76.874                   | Ctse      | cathepsin E                                                                                   |
| -4.355 | 21.414                   | Msln      | mesothelin                                                                                    |
| -4.289 | 26.916                   | Olf164    | olfactory receptor 164                                                                        |
| -4.285 | 55.596                   | Ly86      | lymphocyte antigen 86                                                                         |
| -4.278 | 100.790                  | R3hdml    | R3H domain containing-like                                                                    |

|        |         |               |                                                                                                                                      |
|--------|---------|---------------|--------------------------------------------------------------------------------------------------------------------------------------|
| -4.277 | 12.633  | Ptprg         | protein tyrosine phosphatase, receptor type, G                                                                                       |
| -4.273 | 55.039  | Gimap3        | GTPase, IMAP family member 3                                                                                                         |
| -4.253 | 32.724  | Ldlrad4       | low density lipoprotein receptor class A domain containing 4                                                                         |
| -4.251 | 12.355  | Anks4b        | ankyrin repeat and sterile alpha motif domain containing 4B                                                                          |
| -4.224 | 12.078  | Mecom         | MDS1 and EVI1 complex locus                                                                                                          |
| -4.224 | 82.210  | Thpo          | thrombopoietin                                                                                                                       |
| -4.224 | 31.892  | Slamf6        | SLAM family member 6                                                                                                                 |
| -4.197 | 11.801  | Ano1          | anoctamin 1, calcium activated chloride channel                                                                                      |
| -4.197 | 11.801  | Gpr132        | G protein-coupled receptor 132                                                                                                       |
| -4.185 | 38.132  | Resp18        | regulated endocrine-specific protein 18                                                                                              |
| -4.170 | 11.525  | Cd2           | CD2 antigen                                                                                                                          |
| -4.168 | 37.576  | Gimap7        | GTPase, IMAP family member 7                                                                                                         |
| -4.151 | 18.044  | Msx1          | msh homeobox 1                                                                                                                       |
| -4.133 | 17.765  | C530008M17Rik | RIKEN cDNA C530008M17 gene                                                                                                           |
| -4.115 | 35.910  | Cd19          | CD19 antigen                                                                                                                         |
| -4.106 | 23.025  | Onecut2       | one cut domain, family member 2                                                                                                      |
| -4.076 | 16.929  | Ccr7          | chemokine (C-C motif) receptor 7                                                                                                     |
| -4.074 | 72.214  | A430107P09Rik | RIKEN cDNA A430107P09 gene                                                                                                           |
| -4.057 | 16.651  | Gna14         | guanine nucleotide binding protein, alpha 14                                                                                         |
| -4.017 | 16.096  | Apitd1        | apoptosis-inducing, TAF9-like domain 1                                                                                               |
| -4.013 | 32.869  | Gpr18         | G protein-coupled receptor 18                                                                                                        |
| -3.997 | 15.819  | Dnajc22       | DnaJ (Hsp40) homolog, subfamily C, member 22                                                                                         |
| -3.993 | 9.877   | Camk2n1       | calcium/calmodulin-dependent protein kinase II inhibitor 1                                                                           |
| -3.993 | 9.877   | Commmd8       | COMM domain containing 8                                                                                                             |
| -3.993 | 9.877   | Ippk          | inositol 1,3,4,5,6-pentakisphosphate 2-kinase                                                                                        |
| -3.993 | 9.877   | S1pr1         | sphingosine-1-phosphate receptor 1                                                                                                   |
| -3.976 | 20.547  | Sncb          | synuclein, beta                                                                                                                      |
| -3.974 | 37.053  | Prss2         | protease, serine 2                                                                                                                   |
| -3.961 | 9.604   | Iltgae        | integrin alpha E, epithelial-associated                                                                                              |
| -3.950 | 41.523  | Mzb1          | marginal zone B and B1 cell-specific protein 1                                                                                       |
| -3.935 | 14.990  | Clu           | clusterin                                                                                                                            |
| -3.934 | 24.746  | Tff1          | trefoil factor 1                                                                                                                     |
| -3.929 | 9.332   | Atp8b1        | ATPase, class I, type 8B, member 1                                                                                                   |
| -3.929 | 9.332   | Gpr133        | G protein-coupled receptor 133                                                                                                       |
| -3.896 | 9.061   | Gprin1        | G protein-regulated inducer of neurite outgrowth 1                                                                                   |
| -3.896 | 9.061   | Lrrc66        | leucine rich repeat containing 66                                                                                                    |
| -3.873 | 109.291 | Smpd3         | sphingomyelin phosphodiesterase 3, neutral<br>UDP-N-acetyl-alpha-D-galactosamine:polypeptide N-<br>acetylgalactosaminyltransferase 5 |
| -3.862 | 8.790   | Galnt5        | UDP-N-acetyl-alpha-D-galactosamine:polypeptide N-<br>acetylgalactosaminyltransferase 5                                               |
| -3.862 | 8.790   | Rapgef6       | Rap guanine nucleotide exchange factor (GEF) 6                                                                                       |
| -3.862 | 8.790   | Ybx3          | Y box protein 3                                                                                                                      |
| -3.847 | 13.890  | Sned1         | sushi, nidogen and EGF-like domains 1                                                                                                |
| -3.832 | 18.092  | Rbfox1        | RNA binding protein, fox-1 homolog (C. elegans) 1                                                                                    |
| -3.827 | 8.520   | Thbs1         | thrombospondin 1                                                                                                                     |
| -3.825 | 13.616  | Gcm2          | glial cells missing homolog 2 (Drosophila)                                                                                           |
| -3.792 | 21.769  | Cd83          | CD83 antigen                                                                                                                         |
| -3.764 | 154.940 | Sall4         | sal-like 4 (Drosophila)                                                                                                              |
| -3.764 | 17.009  | Ccr6          | chemokine (C-C motif) receptor 6                                                                                                     |
| -3.759 | 54.695  | Cd2           | CD2 antigen                                                                                                                          |
| -3.754 | 12.796  | Ptp4a3        | protein tyrosine phosphatase 4a3                                                                                                     |
| -3.728 | 16.469  | Ano1          | anoctamin 1, calcium activated chloride channel                                                                                      |
| -3.722 | 20.427  | Clstn3        | calsyntenin 3                                                                                                                        |
| -3.722 | 20.427  | Ttc30a1       | tetratricopeptide repeat domain 30A1                                                                                                 |
| -3.655 | 11.710  | Gabrp         | gamma-aminobutyric acid (GABA) A receptor, pi                                                                                        |
| -3.655 | 11.710  | Gramd4        | GRAM domain containing 4                                                                                                             |
| -3.655 | 11.710  | Slc38a8       | solute carrier family 38, member 8                                                                                                   |
| -3.629 | 11.439  | Txndc5        | thioredoxin domain containing 5                                                                                                      |
| -3.618 | 18.562  | Vmn2r11       | vomer nasal 2, receptor 11                                                                                                           |
| -3.609 | 30.473  | Muc5b         | mucin 5, subtype B, tracheobronchial                                                                                                 |
| -3.609 | 42.916  | Trpa1         | transient receptor potential cation channel, subfamily A, member 1                                                                   |
| -3.608 | 55.627  | Cxcr5         | chemokine (C-X-C motif) receptor 5                                                                                                   |
| -3.602 | 11.170  | Adcy7         | adenylate cyclase 7                                                                                                                  |
| -3.602 | 11.170  | Insc          | inscuteable homolog (Drosophila)                                                                                                     |
| -3.600 | 30.208  | Kcnip1        | Kv channel-interacting protein 1                                                                                                     |
| -3.596 | 14.595  | Abcc4         | ATP-binding cassette, sub-family C (CFTR/MRP), member 4                                                                              |
| -3.591 | 22.542  | Ptpn14        | protein tyrosine phosphatase, non-receptor type 14                                                                                   |
| -3.578 | 46.364  | Ptprt         | protein tyrosine phosphatase, receptor type, T                                                                                       |
| -3.575 | 10.901  | Il2rb         | interleukin 2 receptor, beta chain                                                                                                   |
| -3.556 | 14.063  | Il21r         | interleukin 21 receptor                                                                                                              |
| -3.542 | 28.619  | Thpo          | thrombopoietin                                                                                                                       |
| -3.539 | 17.241  | Hira          | histone cell cycle regulation defective homolog A (S. cerevisiae)                                                                    |
| -3.535 | 13.798  | Pbx1          | pre B cell leukemia homeobox 1                                                                                                       |
| -3.522 | 28.092  | Olf1r164      | olfactory receptor 164                                                                                                               |
| -3.520 | 10.364  | Bai1          | brain-specific angiogenesis inhibitor 1                                                                                              |
| -3.520 | 10.364  | Rpia          | ribose 5-phosphate isomerase A                                                                                                       |
| -3.515 | 13.534  | Onecut2       | one cut domain, family member 2                                                                                                      |
| -3.513 | 24.385  | St8sia3       | ST8 alpha-N-acetyl-neuraminide alpha-2,8-sialyltransferase 3                                                                         |
| -3.491 | 10.097  | Camk2d        | calcium/calmodulin-dependent protein kinase II, delta                                                                                |

|               |                |              |                                                                  |
|---------------|----------------|--------------|------------------------------------------------------------------|
| -3.467        | 48.740         | Aff3         | AF4/FMR2 family, member 3                                        |
| -3.450        | 12.743         | Cd247        | CD247 antigen                                                    |
| -3.442        | 40.797         | Spdef        | SAM pointed domain containing ets transcription factor           |
| -3.432        | 69.389         | Lgals6       | lectin, galactose binding, soluble 6                             |
| -3.432        | 9.564          | Cd5          | CD5 antigen                                                      |
| -3.432        | 9.564          | Duxbl3       | double homeobox B-like 3                                         |
| -3.426        | 46.902         | Ern2         | endoplasmic reticulum (ER) to nucleus signalling 2               |
| -3.406        | 49.305         | Klra18       | killer cell lectin-like receptor, subfamily A, member 18         |
| -3.404        | 15.149         | Nol11        | nucleolar protein 11                                             |
| -3.399        | 42.406         | Capzb        | capping protein (actin filament) muscle Z-line, beta             |
| -3.399        | 42.406         | Rgs10        | regulator of G-protein signalling 10                             |
| -3.376        | 24.429         | Spp2         | secreted phosphoprotein 2                                        |
| -3.371        | 9.035          | Gm8369       | predicted gene 8369                                              |
| -3.371        | 9.035          | Nrarp        | Notch-regulated ankyrin repeat protein                           |
| -3.371        | 9.035          | Sulf1        | sulfatase 1                                                      |
| -3.371        | 9.035          | Wwc1         | WW, C2 and coiled-coil domain containing 1                       |
| -3.369        | 18.309         | Nfasc        | neurofascin                                                      |
| -3.360        | 57.542         | Pld4         | phospholipase D family, member 4                                 |
| -3.355        | 20.977         | Elfn2        | leucine rich repeat and fibronectin type III, extracellular 2    |
| -3.354        | 18.047         | Cgrrf1       | cell growth regulator with ring finger domain 1                  |
| -3.354        | 18.047         | Sh2d1b2      | SH2 domain protein 1B2                                           |
| -3.352        | 40.578         | Gm14461      | predicted gene 14461                                             |
| -3.349        | 14.372         | Ankdd1b      | ankyrin repeat and death domain containing 1B                    |
| -3.349        | 14.372         | Trim44       | tripartite motif-containing 44                                   |
| -3.339        | 8.771          | Ptprn        | protein tyrosine phosphatase, receptor type, N                   |
| -3.337        | 11.437         | Skor2        | SKI family transcriptional corepressor 2                         |
| -3.328        | 5.353          | Rnf19b       | ring finger protein 19B                                          |
| -3.326        | 52.529         | Acan         | aggrecan                                                         |
| -3.320        | 23.135         | Cd79a        | CD79A antigen (immunoglobulin-associated alpha)                  |
| -3.313        | 11.178         | Eid1         | EP300 interacting inhibitor of differentiation 1                 |
| -3.312        | 13.857         | Trim58       | tripartite motif-containing 58                                   |
| -3.307        | 8.508          | Bsg          | basigin                                                          |
| -3.307        | 8.508          | Cd22         | CD22 antigen                                                     |
| -3.307        | 8.508          | Postn        | periostin, osteoblast specific factor                            |
| -3.305        | 35.825         | Dock8        | dedicator of cytokinesis 8                                       |
| -3.302        | 19.940         | Siglec1      | sialic acid binding Ig-like lectin 1, sialoadhesin               |
| -3.289        | 10.919         | Stk32b       | serine/threonine kinase 32B                                      |
| -3.285        | 40.918         | AI607873     | expressed sequence AI607873                                      |
| -3.278        | 95.042         | Clu          | clusterin                                                        |
| -3.274        | 8.246          | Prss2        | protease, serine 2                                               |
| -3.260        | 16.487         | Sla2         | Src-like-adaptor 2                                               |
| -3.258        | 52.102         | Lhx8         | LIM homeobox protein 8                                           |
| -3.240        | 7.985          | Adtrp        | androgen dependent TFPI regulating protein                       |
| -3.240        | 7.985          | Anp32a       | acidic (leucine-rich) nuclear phosphoprotein 32 family, member A |
| -3.240        | 7.985          | Sall4        | sal-like 4 (Drosophila)                                          |
| -3.239        | 10.404         | Plet1        | placenta expressed transcript 1                                  |
| -3.239        | 10.404         | Susd2        | sushi domain containing 2                                        |
| -3.220        | 18.396         | Btbd11       | BTB (POZ) domain containing 11                                   |
| -3.213        | 12.580         | Slc45a3      | solute carrier family 45, member 3                               |
| -3.213        | 10.148         | Akap13       | A kinase (PRKA) anchor protein 13                                |
| -3.213        | 10.148         | Efna5        | ephrin A5                                                        |
| -3.213        | 10.148         | Foxp1        | forkhead box P1                                                  |
| -3.213        | 10.148         | Tox          | thymocyte selection-associated high mobility group box           |
| -3.210        | 44.166         | Kng2         | kininogen 2                                                      |
| -3.205        | 7.725          | Ikzf3        | IKAROS family zinc finger 3                                      |
| <b>-2.372</b> | <b>140.221</b> | <b>Sftpb</b> | <b>surfactant associated protein B</b>                           |
| <b>-2.077</b> | <b>61.328</b>  | <b>Foxa2</b> | <b>forkhead box A2</b>                                           |

**Supplementary Table 5: ROSE algorithm on H3K27ac peaks in SCC samples**  
top 200 somatic super-enhancers associated with protein coding genes, and microRNA 21a

| Ranking  | Gene Name     | Gene Description                                               |
|----------|---------------|----------------------------------------------------------------|
| 1        | Tomm20        | translocase of outer mitochondrial membrane 20 homolog (yeast) |
| 2        | Mir21a        | microRNA 21a                                                   |
| 3        | Ergic1        | endoplasmic reticulum-golgi intermediate compartment (ERGIC) 1 |
| 4        | Mcl1          | myeloid cell leukemia sequence 1                               |
| <b>5</b> | <b>Ifitm3</b> | <b>interferon induced transmembrane protein 3</b>              |
| 6        | 1600014C10Rik | RIKEN cDNA 1600014C10 gene                                     |
| 7        | Zfp217        | zinc finger protein 217                                        |
| 8        | Socs3         | suppressor of cytokine signaling 3                             |
| 9        | Bcl2l1        | BCL2-like 1                                                    |
| 10       | Furin         | furin (paired basic amino acid cleaving enzyme)                |
| 11       | Myh9          | myosin, heavy polypeptide 9, non-muscle                        |
| 12       | Ier5          | immediate early response 5                                     |
| 13       | E030018B13Rik | RIKEN cDNA E030018B13 gene                                     |



|    |          |                                                                                              |
|----|----------|----------------------------------------------------------------------------------------------|
| 14 | Pxn      | paxillin                                                                                     |
| 15 | Irf2bp2  | interferon regulatory factor 2 binding protein 2                                             |
| 16 | Lrp1     | low density lipoprotein receptor-related protein 1                                           |
| 17 | Mbp      | myelin basic protein                                                                         |
| 18 | Ccdc12   | coiled-coil domain containing 12                                                             |
| 19 | Ptpn1    | protein tyrosine phosphatase, non-receptor type 1                                            |
| 20 | Sik1     | salt inducible kinase 1                                                                      |
| 21 | Tatdn2   | TatD DNase domain containing 2                                                               |
| 22 | Irf1     | interferon regulatory factor 1                                                               |
| 23 | Rara     | retinoic acid receptor, alpha                                                                |
| 24 | Sorl1    | sortilin-related receptor, LDLR class A repeats-containing                                   |
| 25 | Lyst     | lysosomal trafficking regulator                                                              |
| 26 | Cap1     | CAP, adenylate cyclase-associated protein 1 (yeast)                                          |
| 27 | Gsr      | glutathione reductase                                                                        |
| 28 | Cd14     | CD14 antigen                                                                                 |
| 29 | Spatc1   | spermatogenesis and centriole associated 1                                                   |
| 30 | Rin3     | Ras and Rab interactor 3                                                                     |
| 31 | Ly6e     | lymphocyte antigen 6 complex, locus E                                                        |
| 32 | Aff1     | AF4/FMR2 family, member 1                                                                    |
| 33 | Iqgap1   | IQ motif containing GTPase activating protein 1                                              |
| 34 | Incenp   | inner centromere protein                                                                     |
| 35 | Tgfb1    | transforming growth factor, beta receptor I                                                  |
| 36 | S100a9   | S100 calcium binding protein A9 (calgranulin B)                                              |
| 37 | Btg2     | B cell translocation gene 2, anti-proliferative                                              |
| 38 | Pfkfb3   | 6-phosphofructo-2-kinase/fructose-2,6-biphosphatase 3                                        |
| 39 | Trim8    | tripartite motif-containing 8                                                                |
| 40 | Fam49b   | family with sequence similarity 49, member B                                                 |
| 41 | Tspan14  | tetraspanin 14                                                                               |
| 42 | Cxcr2    | chemokine (C-X-C motif) receptor 2                                                           |
| 43 | Ptpn22   | protein tyrosine phosphatase, non-receptor type 22 (lymphoid)                                |
| 44 | Zmiz1    | zinc finger, MIZ-type containing 1                                                           |
| 45 | Irf2bpl  | interferon regulatory factor 2 binding protein-like                                          |
| 46 | Fgr      | Gardner-Rasheed feline sarcoma viral (Fgr) oncogene homolog                                  |
| 47 | Actb     | actin, beta                                                                                  |
| 48 | Rassf6   | Ras association (RalGDS/AF-6) domain family member 6                                         |
| 49 | Midn     | midnolin                                                                                     |
| 50 | Csf3r    | colony stimulating factor 3 receptor (granulocyte)                                           |
| 51 | Ndst1    | N-deacetylase/N-sulfotransferase (heparan glucosaminyl) 1                                    |
| 52 | Asprv1   | aspartic peptidase, retroviral-like 1                                                        |
| 53 | Irf2bpl  | interferon regulatory factor 2 binding protein-like                                          |
| 54 | Bcl3     | B cell leukemia/lymphoma 3                                                                   |
| 55 | Junb     | jun B proto-oncogene                                                                         |
| 56 | Litaf    | LPS-induced TN factor                                                                        |
| 57 | Cflar    | CASP8 and FADD-like apoptosis regulator                                                      |
| 58 | Osgin1   | oxidative stress induced growth inhibitor 1                                                  |
| 59 | Clvs1    | clavesin 1                                                                                   |
| 60 | Slf2     | schlafen 2                                                                                   |
| 61 | Fbxl5    | F-box and leucine-rich repeat protein 5                                                      |
| 62 | Cmip     | c-Maf inducing protein                                                                       |
| 63 | Pstpip1  | proline-serine-threonine phosphatase-interacting protein 1                                   |
| 64 | Mknk2    | MAP kinase-interacting serine/threonine kinase 2                                             |
| 65 | Rassf3   | Ras association (RalGDS/AF-6) domain family member 3                                         |
| 66 | Eea1     | early endosome antigen 1                                                                     |
| 67 | Sgms1    | sphingomyelin synthase 1                                                                     |
| 68 | Actn1    | actinin, alpha 1                                                                             |
| 69 | Tgm2     | transglutaminase 2, C polypeptide                                                            |
| 70 | Ubx11    | UBX domain protein 11                                                                        |
| 71 | Hist1h3e | histone cluster 1, H3e                                                                       |
| 72 | Fkbp8    | FK506 binding protein 8                                                                      |
| 73 | Ifnar2   | interferon (alpha and beta) receptor 2                                                       |
| 74 | Il4ra    | interleukin 4 receptor, alpha                                                                |
| 75 | Zfp608   | zinc finger protein 608                                                                      |
| 76 | Ninj2    | ninjurin 2                                                                                   |
| 77 | Spi1     | spleen focus forming virus (SFFV) proviral integration oncogene                              |
| 78 | Krt80    | keratin 80                                                                                   |
| 79 | Il1r2    | interleukin 1 receptor, type II                                                              |
| 80 | Vps54    | vacuolar protein sorting 54 (yeast)                                                          |
| 81 | Cd44     | CD44 antigen                                                                                 |
| 82 | Ptpn6    | protein tyrosine phosphatase, non-receptor type 6                                            |
| 83 | Adam19   | a disintegrin and metallopeptidase domain 19 (meltrin beta)                                  |
| 84 | Hic1     | hypermethylated in cancer 1                                                                  |
| 85 | Tnrc18   | trinucleotide repeat containing 18                                                           |
| 86 | Atf1     | activating transcription factor 1                                                            |
| 87 | Pim1     | proviral integration site 1                                                                  |
| 88 | Tbl1xr1  | transducin (beta)-like 1X-linked receptor 1                                                  |
| 89 | Plekha2  | pleckstrin homology domain-containing, family A (phosphoinositide binding specific) member 2 |
| 90 | Ifngr1   | interferon gamma receptor 1                                                                  |
| 91 | Xbp1     | X-box binding protein 1                                                                      |

|     |               |                                                                                     |
|-----|---------------|-------------------------------------------------------------------------------------|
| 92  | Cxcl1         | chemokine (C-X-C motif) ligand 1                                                    |
| 93  | S100a3        | S100 calcium binding protein A3                                                     |
| 94  | Armc12        | armadillo repeat containing 12                                                      |
| 95  | Hif1a         | hypoxia inducible factor 1, alpha subunit                                           |
| 96  | Lasp1         | LIM and SH3 protein 1                                                               |
| 97  | Ifi202b       | interferon regulatory factor 2 binding protein 2                                    |
| 98  | Pf4           | platelet factor 4                                                                   |
| 99  | Nek6          | NIMA (never in mitosis gene a)-related expressed kinase 6                           |
| 100 | Zfp36         | zinc finger protein 36                                                              |
| 101 | Cd9           | CD9 antigen                                                                         |
| 102 | Rab7          | RAB7, member RAS oncogene family                                                    |
| 103 | Ndufs8        | NADH dehydrogenase (ubiquinone) Fe-S protein 8                                      |
| 104 | Gnai2         | guanine nucleotide binding protein (G protein), alpha inhibiting 2                  |
| 105 | Cyth4         | cytohesin 4                                                                         |
| 106 | Rhof          | ras homolog gene family, member f                                                   |
| 107 | Coro2a        | coronin, actin binding protein 2A                                                   |
| 108 | Dnajb12       | DnaJ (Hsp40) homolog, subfamily B, member 12                                        |
| 109 | Fos           | FBJ osteosarcoma oncogene                                                           |
| 110 | Itgb2         | integrin beta 2                                                                     |
| 111 | Msl1          | male-specific lethal 1 homolog (Drosophila)                                         |
| 112 | Snx29         | sorting nexin 29                                                                    |
| 113 | Notch1        | notch 1                                                                             |
| 114 | Rab31         | RAB31, member RAS oncogene family                                                   |
| 115 | C1qtnf9       | C1q and tumor necrosis factor related protein 9                                     |
| 116 | Jun           | jun proto-oncogene                                                                  |
| 117 | Ctsd          | cathepsin D                                                                         |
| 118 | 1110007C09Rik | RIKEN cDNA 1110007C09 gene                                                          |
| 119 | Fosl2         | fos-like antigen 2                                                                  |
| 120 | 2810408A11Rik | RIKEN cDNA 2810408A11 gene                                                          |
| 121 | Wasf2         | WAS protein family, member 2                                                        |
| 122 | Cdkn2aipnl    | CDKN2A interacting protein N-terminal like                                          |
| 123 | Inpp5d        | inositol polyphosphate-5-phosphatase D                                              |
| 124 | Phlda1        | pleckstrin homology-like domain, family A, member 1                                 |
| 125 | Cubn          | cubilin (intrinsic factor-cobalamin receptor)                                       |
| 126 | Alcam         | activated leukocyte cell adhesion molecule                                          |
| 127 | Tfeb          | transcription factor EB                                                             |
| 128 | Tpm1          | tropomyosin 1, alpha                                                                |
| 129 | Sh3bp2        | SH3-domain binding protein 2                                                        |
| 130 | Tctex1d4      | Tctex1 domain containing 4                                                          |
| 131 | C5ar2         | complement component 5a receptor 2                                                  |
| 132 | Fcgr3         | Fc receptor, IgG, low affinity III                                                  |
| 133 | Ly6e          | lymphocyte antigen 6 complex, locus E                                               |
| 134 | Bcl6          | B cell leukemia/lymphoma 6                                                          |
| 135 | Ccdc80        | coiled-coil domain containing 80                                                    |
| 136 | Cux1          | cut-like homeobox 1                                                                 |
| 137 | Cxcr4         | chemokine (C-X-C motif) receptor 4                                                  |
| 138 | N4bp1         | NEDD4 binding protein 1                                                             |
| 139 | Zfx3          | zinc finger homeobox 3                                                              |
| 140 | Lcp1          | lymphocyte cytosolic protein 1                                                      |
| 141 | Tmem140       | transmembrane protein 140                                                           |
| 142 | Kdm6b         | KDM1 lysine (K)-specific demethylase 6B                                             |
| 143 | Tgif1         | TGFB-induced factor homeobox 1                                                      |
| 144 | Nfkbia        | nuclear factor of kappa light polypeptide gene enhancer in B cells inhibitor, alpha |
| 145 | Cotl1         | coactosin-like 1 (Dictyostelium)                                                    |
| 146 | Entpd1        | ectonucleoside triphosphate diphosphohydrolase 1                                    |
| 147 | Swap70        | SWA-70 protein                                                                      |
| 148 | Hnrnpl        | heterogeneous nuclear ribonucleoprotein L                                           |
| 149 | Rreb1         | ras responsive element binding protein 1                                            |
| 150 | Dhrs3         | dehydrogenase/reductase (SDR family) member 3                                       |
| 151 | Tbc1d14       | TBC1 domain family, member 14                                                       |
| 152 | Ccdc91        | coiled-coil domain containing 91                                                    |
| 153 | Sgms1         | sphingomyelin synthase 1                                                            |
| 154 | Runx1         | runt related transcription factor 1                                                 |
| 155 | Rbm47         | RNA binding motif protein 47                                                        |
| 156 | Csf1          | colony stimulating factor 1 (macrophage)                                            |
| 157 | Prss22        | protease, serine 22                                                                 |
| 158 | Klhl6         | kelch-like 6                                                                        |
| 159 | Fpr1          | formyl peptide receptor 1                                                           |
| 160 | Osbpl9        | oxysterol binding protein-like 9                                                    |
| 161 | Akap13        | A kinase (PRKA) anchor protein 13                                                   |
| 162 | Klf3          | Kruppel-like factor 3 (basic)                                                       |
| 163 | Lipc          | lipase, hepatic                                                                     |
| 164 | Pla2g7        | phospholipase A2, group VII (platelet-activating factor acetylhydrolase, plasma)    |
| 165 | Chd2          | chromodomain helicase DNA binding protein 2                                         |
| 166 | Smad7         | SMAD family member 7                                                                |
| 167 | Agps          | alkylglycerone phosphate synthase                                                   |
| 168 | Cdt1          | chromatin licensing and DNA replication factor 1                                    |
| 169 | Pigx          | phosphatidylinositol glycan anchor biosynthesis, class X                            |

|     |               |                                                                        |
|-----|---------------|------------------------------------------------------------------------|
| 170 | Amer2         | APC membrane recruitment 2                                             |
| 171 | Zbtb42        | zinc finger and BTB domain containing 42                               |
| 172 | Fam129b       | family with sequence similarity 129, member B                          |
| 173 | Egln3         | egl-9 family hypoxia-inducible factor 3                                |
| 174 | Tle3          | transducin-like enhancer of split 3, homolog of Drosophila E(spl)      |
| 175 | Pacsin2       | protein kinase C and casein kinase substrate in neurons 2              |
| 176 | Tpst2         | protein-tyrosine sulfotransferase 2                                    |
| 177 | Ly6a          | lymphocyte antigen 6 complex, locus A                                  |
| 178 | Fli1          | Friend leukemia integration 1                                          |
| 179 | Ubc           | ubiquitin C                                                            |
| 180 | Pde4b         | phosphodiesterase 4B, cAMP specific                                    |
| 181 | 6430531B16Rik | RIKEN cDNA 6430531B16 gene                                             |
| 182 | Klhdc8a       | kelch domain containing 8A                                             |
| 183 | Rin3          | Ras and Rab interactor 3                                               |
| 184 | Ier3          | immediate early response 3                                             |
| 185 | Zfp541        | zinc finger protein 541                                                |
| 186 | Ankrd11       | ankyrin repeat domain 11                                               |
| 187 | Tnfrsf26      | tumor necrosis factor receptor superfamily, member 26                  |
| 188 | Erg           | avian erythroblastosis virus E-26 (v-ets) oncogene related             |
| 189 | Vps37b        | vacuolar protein sorting 37B (yeast)                                   |
| 190 | Ptma          | prothymosin alpha                                                      |
| 191 | Lrrfip1       | leucine rich repeat (in FLII) interacting protein 1                    |
| 192 | Tnfrsf1b      | tumor necrosis factor receptor superfamily, member 1b                  |
| 193 | Zfp608        | zinc finger protein 608                                                |
| 194 | Zfp503        | zinc finger protein 503                                                |
| 195 | Rhob          | ras homolog gene family, member B                                      |
| 196 | Slc16a11      | solute carrier family 16 (monocarboxylic acid transporters), member 11 |
| 197 | Dusp6         | dual specificity phosphatase 6                                         |
| 198 | Dhrs3         | dehydrogenase/reductase (SDR family) member 3                          |
| 199 | Tnfaip2       | tumor necrosis factor, alpha-induced protein 2                         |
| 200 | Pagr1a        | PAXIP1 associated glutamate rich protein 1A                            |

**Supplementary Table 6: ROSE algorithm on H3K27ac peaks in ADC samples**  
top 200 somatic super-enhancers associated with protein coding genes, and microRNA 21a

| Ranking | Gene Name     | Gene Description                                               |
|---------|---------------|----------------------------------------------------------------|
| 1       | Irf2bp2       | interferon regulatory factor 2 binding protein 2               |
| 2       | Mir21a        | microRNA 21a                                                   |
| 3       | Sik1          | salt inducible kinase 1                                        |
| 4       | Rad51b        | RAD51 homolog B                                                |
| 5       | Myh9          | myosin, heavy polypeptide 9, non-muscle                        |
| 6       | Ddit4         | DNA-damage-inducible transcript 4                              |
| 7       | Mcl1          | myeloid cell leukemia sequence 1                               |
| 8       | Ergic1        | endoplasmic reticulum-golgi intermediate compartment (ERGIC) 1 |
| 9       | Socs3         | suppressor of cytokine signaling 3                             |
| 10      | Abhd2         | abhydrolase domain containing 2                                |
| 11      | Ly6e          | lymphocyte antigen 6 complex, locus E                          |
| 12      | Sgms1         | sphingomyelin synthase 1                                       |
| 13      | Dhrs3         | dehydrogenase/reductase (SDR family) member 3                  |
| 14      | Zmiz1         | zinc finger, MIZ-type containing 1                             |
| 15      | Carns1        | carnosine synthase 1                                           |
| 16      | Bcl2l1        | BCL2-like 1                                                    |
| 17      | Trim8         | tripartite motif-containing 8                                  |
| 18      | Smad3         | SMAD family member 3                                           |
| 19      | Cblc          | Casitas B-lineage lymphoma c                                   |
| 20      | Irf2          | interferon regulatory factor 2                                 |
| 21      | Capzb         | capping protein (actin filament) muscle Z-line, beta           |
| 22      | Irf2bp1       | interferon regulatory factor 2 binding protein-like            |
| 23      | E030018B13Rik | RIKEN cDNA E030018B13 gene                                     |
| 24      | Lta           | lymphotoxin A                                                  |
| 25      | Sdc1          | syndecan 1                                                     |
| 26      | Ski           | ski sarcoma viral oncogene homolog (avian)                     |
| 27      | Hyal3         | hyaluronoglucosaminidase 3                                     |
| 28      | Dusp7         | dual specificity phosphatase 7                                 |
| 29      | Il4ra         | interleukin 4 receptor, alpha                                  |
| 30      | Zfp217        | zinc finger protein 217                                        |
| 31      | Htra4         | HtrA serine peptidase 4                                        |
| 32      | Pmepa1        | prostate transmembrane protein, androgen induced 1             |
| 33      | Kxd1          | KxDL motif containing 1                                        |
| 34      | Tpm1          | tropomyosin 1, alpha                                           |
| 35      | Cebpa         | CCAAT/enhancer binding protein (C/EBP), alpha                  |
| 36      | Pgpep1        | pyroglutamyl-peptidase I                                       |

|     |               |                                                                                                                  |
|-----|---------------|------------------------------------------------------------------------------------------------------------------|
| 37  | Actn1         | actinin, alpha 1                                                                                                 |
| 38  | St3gal1       | ST3 beta-galactoside alpha-2,3-sialyltransferase 1                                                               |
| 39  | Plekhf1       | pleckstrin homology domain containing, family F (with FYVE domain) member 1                                      |
| 40  | Synpo         | synaptopodin                                                                                                     |
| 41  | Phlda1        | pleckstrin homology-like domain, family A, member 1                                                              |
| 42  | Ier5          | immediate early response 5                                                                                       |
| 43  | Sema4b        | sema domain, immunoglobulin domain (Ig), transmembrane domain (TM) and short cytoplasmic domain, (semaphorin) 4B |
| 44  | Zmynd8        | zinc finger, MYND-type containing 8                                                                              |
| 45  | Crebzf        | CREB/ATF bZIP transcription factor                                                                               |
| 46  | Smad7         | SMAD family member 7                                                                                             |
| 47  | Ndst1         | N-deacetylase/N-sulfotransferase (heparan glucosaminyl) 1                                                        |
| 48  | Tspan14       | tetraspanin 14                                                                                                   |
| 49  | Slc34a3       | solute carrier family 34 (sodium phosphate), member 3                                                            |
| 50  | Furin         | furin (paired basic amino acid cleaving enzyme)                                                                  |
| 51  | Btg2          | B cell translocation gene 2, anti-proliferative                                                                  |
| 52  | Ccdc12        | coiled-coil domain containing 12                                                                                 |
| 53  | Fam129b       | family with sequence similarity 129, member B                                                                    |
| 54  | Rgs3          | regulator of G-protein signaling 3                                                                               |
| 55  | Plekhg2       | pleckstrin homology domain containing, family G (with RhoGef domain) member 2                                    |
| 56  | Tnfrsf1b      | tumor necrosis factor receptor superfamily, member 1b                                                            |
| 57  | Adss1         | adenylosuccinate synthetase like 1                                                                               |
| 58  | Ctsd          | cathepsin D                                                                                                      |
| 59  | Shb           | src homology 2 domain-containing transforming protein B                                                          |
| 60  | Pxn           | paxillin                                                                                                         |
| 61  | Syngn2        | synaptogyrin 2                                                                                                   |
| 62  | Wasf2         | WAS protein family, member 2                                                                                     |
| 63  | <b>Sftpb</b>  | <b>surfactant associated protein B</b>                                                                           |
| 64  | Col4a2        | collagen, type IV, alpha 2                                                                                       |
| 65  | 1600014C23Rik | RIKEN cDNA 1600014C23 gene                                                                                       |
| 66  | Elk3          | ELK3, member of ETS oncogene family                                                                              |
| 67  | Hif1a         | hypoxia inducible factor 1, alpha subunit                                                                        |
| 68  | Vgll4         | vestigial like 4 (Drosophila)                                                                                    |
| 69  | Sipa1l3       | signal-induced proliferation-associated 1 like 3                                                                 |
| 70  | Lipc          | lipase, hepatic                                                                                                  |
| 71  | Tgif1         | TGFB-induced factor homeobox 1                                                                                   |
| 72  | Tnrc18        | trinucleotide repeat containing 18                                                                               |
| 73  | Ak2           | adenylate kinase 2                                                                                               |
| 74  | Rac2          | RAS-related C3 botulinum substrate 2                                                                             |
| 75  | Ech1          | enoyl coenzyme A hydratase 1, peroxisomal                                                                        |
| 76  | Myo1e         | myosin IE                                                                                                        |
| 77  | Ptpn1         | protein tyrosine phosphatase, non-receptor type 1                                                                |
| 78  | Coro2a        | coronin, actin binding protein 2A                                                                                |
| 79  | Tmem107       | transmembrane protein 107                                                                                        |
| 80  | Bcar3         | breast cancer anti-estrogen resistance 3                                                                         |
| 81  | Zfp36l1       | zinc finger protein 36, C3H type-like 1                                                                          |
| 82  | Pim1          | proviral integration site 1                                                                                      |
| 83  | Junb          | jun B proto-oncogene                                                                                             |
| 84  | Src           | Rous sarcoma oncogene                                                                                            |
| 85  | Actb          | actin, beta                                                                                                      |
| 86  | B3gnt7        | UDP-GlcNAc:betaGal beta-1,3-N-acetylglucosaminyltransferase 7                                                    |
| 87  | Rara          | retinoic acid receptor, alpha                                                                                    |
| 88  | Tatdn2        | TatD DNase domain containing 2                                                                                   |
| 89  | Fth1          | ferritin heavy chain 1                                                                                           |
| 90  | Baiap2        | brain-specific angiogenesis inhibitor 1-associated protein 2                                                     |
| 91  | Epha2         | Eph receptor A2                                                                                                  |
| 92  | Iqgap1        | IQ motif containing GTPase activating protein 1                                                                  |
| 93  | Krt8          | keratin 8                                                                                                        |
| 94  | Midn          | midnolin                                                                                                         |
| 95  | Pwwp2b        | PWWP domain containing 2B                                                                                        |
| 96  | Mex3a         | mex3 homolog A (C. elegans)                                                                                      |
| 97  | Sbno2         | strawberry notch homolog 2 (Drosophila)                                                                          |
| 98  | Ccr7          | chemokine (C-C motif) receptor 7                                                                                 |
| 99  | S100a4        | S100 calcium binding protein A4                                                                                  |
| 100 | Laptn4a       | lysosomal-associated protein transmembrane 4A                                                                    |
| 101 | Fcgr2b        | Fc receptor, IgG, low affinity IIb                                                                               |
| 102 | Foxp1         | forkhead box P1                                                                                                  |
| 103 | Fos           | FBJ osteosarcoma oncogene                                                                                        |
| 104 | Cerk          | ceramide kinase                                                                                                  |
| 105 | Setd1b        | SET domain containing 1B                                                                                         |
| 106 | Asprv1        | aspartic peptidase, retroviral-like 1                                                                            |
| 107 | Myof          | myoferlin                                                                                                        |
| 108 | Mknk2         | MAP kinase-interacting serine/threonine kinase 2                                                                 |
| 109 | Actn4         | actinin alpha 4                                                                                                  |
| 110 | Rassf2        | Ras association (RaIGDS/AF-6) domain family member 2                                                             |
| 111 | Ninj2         | ninjurin 2                                                                                                       |



|     |               |                                                                                               |
|-----|---------------|-----------------------------------------------------------------------------------------------|
| 112 | Ddx47         | DEAD (Asp-Glu-Ala-Asp) box polypeptide 47                                                     |
| 113 | Hes1          | hairly and enhancer of split 1 (Drosophila)                                                   |
| 114 | D8Erttd82e    | DNA segment, Chr 8, ERATO Doi 82, expressed                                                   |
| 115 | Pdlim2        | PDZ and LIM domain 2                                                                          |
| 116 | Nr1d1         | nuclear receptor subfamily 1, group D, member 1                                               |
| 117 | Rreb1         | ras responsive element binding protein 1                                                      |
| 118 | Sep9          | septin 9                                                                                      |
| 119 | Lrp1          | low density lipoprotein receptor-related protein 1                                            |
| 120 | Fam49b        | family with sequence similarity 49, member B                                                  |
| 121 | Pacsin2       | protein kinase C and casein kinase substrate in neurons 2                                     |
| 122 | Cdkn2b        | cyclin-dependent kinase inhibitor 2B (p15, inhibits CDK4)                                     |
| 123 | Mbp           | myelin basic protein                                                                          |
| 124 | Cyth1         | cytohesin 1                                                                                   |
| 125 | Hspa8         | heat shock protein 8                                                                          |
| 126 | Itpk1         | inositol 1,3,4-triphosphate 5/6 kinase                                                        |
| 127 | Ly86          | lymphocyte antigen 86                                                                         |
| 128 | Scgb1a1       | secretoglobin, family 1A, member 1 (uteroglobin)                                              |
| 129 | Mpv17l2       | MPV17 mitochondrial membrane protein-like 2                                                   |
| 130 | Ypel3         | yippee-like 3 (Drosophila)                                                                    |
| 131 | Mpeg1         | macrophage expressed gene 1                                                                   |
| 132 | Dusp6         | dual specificity phosphatase 6                                                                |
| 133 | Notch2        | notch 2                                                                                       |
| 134 | Plau          | plasminogen activator, urokinase                                                              |
| 135 | Irf2bpl       | interferon regulatory factor 2 binding protein-like                                           |
| 136 | Lama5         | laminin, alpha 5                                                                              |
| 137 | Piezo1        | piezo-type mechanosensitive ion channel component 1                                           |
| 138 | Fam53b        | family with sequence similarity 53, member B                                                  |
| 139 | Ttc7          | tetratricopeptide repeat domain 7                                                             |
| 140 | E230025N22Rik | Riken cDNA E230025N22 gene                                                                    |
| 141 | Lrrfp1        | leucine rich repeat (in FLII) interacting protein 1                                           |
| 142 | Hnrnpa3       | heterogeneous nuclear ribonucleoprotein A3                                                    |
| 143 | Gsr           | glutathione reductase                                                                         |
| 144 | Ldlrap1       | low density lipoprotein receptor adaptor protein 1                                            |
| 145 | Ppard         | peroxisome proliferator activator receptor delta                                              |
| 146 | S1pr2         | sphingosine-1-phosphate receptor 2                                                            |
| 147 | Nek6          | NIMA (never in mitosis gene a)-related expressed kinase 6                                     |
| 148 | Armc12        | armadillo repeat containing 12                                                                |
| 149 | Hfe           | hemochromatosis                                                                               |
| 150 | Adamts4       | a disintegrin-like and metallopeptidase (reprolysin type) with thrombospondin type 1 motif, 4 |
| 151 | Elmsan1       | ELM2 and Myb/SANT-like domain containing 1                                                    |
| 152 | Ctsc          | cathepsin C                                                                                   |
| 153 | Spag7         | sperm associated antigen 7                                                                    |
| 154 | Gpr146        | G protein-coupled receptor 146                                                                |
| 155 | Lasp1         | LIM and SH3 protein 1                                                                         |
| 156 | Clic1         | chloride intracellular channel 1                                                              |
| 157 | Gltscr1       | glioma tumor suppressor candidate region gene 1                                               |
| 158 | Aff1          | AF4/FMR2 family, member 1                                                                     |
| 159 | Rbm47         | RNA binding motif protein 47                                                                  |
| 160 | Pnrc2         | proline-rich nuclear receptor coactivator 2                                                   |
| 161 | Zc3h4         | zinc finger CCCH-type containing 4                                                            |
| 162 | Dok1          | docking protein 1                                                                             |
| 163 | Hpcal1        | hippocalcin-like 1                                                                            |
| 164 | Rassf3        | Ras association (RalGDS/AF-6) domain family member 3                                          |
| 165 | Bcl9l         | B cell CLL/lymphoma 9-like                                                                    |
| 166 | Spns2         | spinster homolog 2                                                                            |
| 167 | Myzap         | myocardial zonula adherens protein                                                            |
| 168 | Ier5l         | immediate early response 5-like                                                               |
| 169 | Pkig          | protein kinase inhibitor, gamma                                                               |
| 170 | Vamp5         | vesicle-associated membrane protein 5                                                         |
| 171 | Scd2          | stearoyl-Coenzyme A desaturase 2                                                              |
| 172 | C1qtnf9       | C1q and tumor necrosis factor related protein 9                                               |
| 173 | Plac8         | placenta-specific 8                                                                           |
| 174 | Litaf         | LPS-induced TN factor                                                                         |
| 175 | Ifi47         | interferon gamma inducible protein 47                                                         |
| 176 | Ccdc19        | coiled-coil domain containing 19                                                              |
| 177 | Snai1         | snail family zinc finger 1                                                                    |
| 178 | Tgfb2         | transforming growth factor, beta receptor II                                                  |
| 179 | Nfkbia        | nuclear factor of kappa light polypeptide gene enhancer in B cells inhibitor, alpha           |
| 180 | Mgat5         | mannoside acetylglucosaminyltransferase 5                                                     |
| 181 | Cflar         | CASP8 and FADD-like apoptosis regulator                                                       |
| 182 | Cmip          | c-Maf inducing protein                                                                        |
| 183 | Polr2e        | polymerase (RNA) II (DNA directed) polypeptide E                                              |
| 184 | Rasa3         | RAS p21 protein activator 3                                                                   |
| 185 | Tgm2          | transglutaminase 2, C polypeptide                                                             |
| 186 | BC051665      | cDNA sequence BC051665                                                                        |
| 187 | Synj2         | synaptojanin 2                                                                                |

|     |          |                                                                                                |
|-----|----------|------------------------------------------------------------------------------------------------|
| 188 | Pnpla2   | patatin-like phospholipase domain containing 2                                                 |
| 189 | Metrn1   | meteorin, glial cell differentiation regulator-like                                            |
| 190 | Sdc4     | syndecan 4                                                                                     |
| 191 | Igfbp7   | insulin-like growth factor binding protein 7                                                   |
| 192 | Mrpl52   | mitochondrial ribosomal protein L52                                                            |
| 193 | Bahcc1   | BAH domain and coiled-coil containing 1                                                        |
| 194 | St6gal1  | beta galactoside alpha 2,6 sialyltransferase 1                                                 |
| 195 | Slc9a3r1 | solute carrier family 9 (sodium/hydrogen exchanger), member 3 regulator 1                      |
| 196 | Elmo3    | engulfment and cell motility 3                                                                 |
| 197 | Herpud1  | homocysteine-inducible, endoplasmic reticulum stress-inducible, ubiquitin-like domain member 1 |
| 198 | Adam19   | a disintegrin and metallopeptidase domain 19 (meltrin beta)                                    |
| 199 | Dyrk3    | dual-specificity tyrosine-(Y)-phosphorylation regulated kinase 3                               |
| 200 | Sh3bp4   | SH3-domain binding protein 4                                                                   |
